# Supplementary material for: Anatomical location of AICA loop in CPA as a prognostic factor for ISSNHL
Source: PeerJ. 2019 Mar 11;7:e6582. doi: 10.7717/peerj.6582 (PMC6417406; doi:10.7717/peerj.6582)
Supplement: File S1 [file peerj-07-6582-s001.xlsx]

## Sheet: data
gender	age		side	comobidity	DM	HTN	onset to MRI	duration	steroid to MRI	dizziness		ipsilateral = mm2	contralateral = mm2	relative ratio A	ipsilateral RR B	contralateral RR B	neu	lym	NLR		ESR	CRP	Viral lab	viral IG	virus type	initial hearing	post tx hearing	improve rate	delta dB	improvement btw 30~50%	id	Cahvada Rt	Gorie Rt	Cahvada Lt	Gorie Lt	Pre 500	Pre 1000	Pre 4000	Pre 8000	Pre SRT	Post 500	Post 1000	Post 4000	Post 8000	Post SRT	Tinnitus	contralateral	Pre 500	Pre 1000
2	57	1	1	2	0	1	7	1	3	2		1.12376	1.0905	103.05	128.207	110.002	84	13.7	6.13139		23	0.33				79.1667	21.6667	72.6316	57.5	0	10202238	I	III	II	III	90	80	75	95	CNT	15	15	30	55	96	1		0	0
1	17	0	2		0	0	2	0	2	2		1.74014	1.23622	140.763	107.884	91.7315	77.1	16.5	4.67273		2	0.34	1	1	1,2	67.5	108.333	0	0	1	09644971	I	I	II	I	55	60	70	80	84	100	110	110	110	CNT	1		10	5
1	48	1	2	1	1	0	1	0	3	1		0.997896	1.2148	82.1447	84.0981	117.925	77.9	15.7	4.96178		2	0.35				110	110	0	0	1	09094040	I	I	II	III	110	110	110	110	CNT	110	110	110	110	CNT	1		20	10
2	67	1	2	1,2,3	1	1	3	0	3	2		1.52515	1.03089	147.944	125.234	134.102	54.4	37.1	1.46631		21	0.33	1	1	1,2	82.5	22.5	72.7273	60	0	10424805	I	II	II	III	95	85	80	90	CNT	20	30	20	35	100	1		15	20
1	28	0	1		0	0	2	0	1	2		0.879625	1.1807	74.5002	106.663	100.063	72.6	20.9	3.47368		9	0.32	1	1	2	32.5	14.1667	56.4103	18.3333	0	10125223	II	III	II	II	95	95	90	90	CNT	15	20	65	90	88	1		5	5
2	57	1	1	2	0	1	7	1	3	2		1.04403	1.07091	97.4894	89.1667	107.856	84	13.7	6.13139		23	0.33	1	1	1,2	79.1667	21.6667	72.6316	57.5	0	10202238	I	III	II	III	40	75	95	85	8	15	20	30	35	100	1		0	0
1	60	1	1		0	0	2	0	1	2		0.992585	0.995335	99.7238	178.63	75.1674	53.3	37.1	1.43666		23	0.33				77.5	22.5	70.9677	55	0	02360955	II	II	II	III	80	80	75	75	CNT	15	20	40	75	100	1		10	15
1	36	0	2		0	0	4	1	3	2		1.11639	1.26003	88.6006	121.374	105.579	70.3	22.9	3.06987		14	0.32				108.333	105	3.07692	3.33333	1	10191004	II	I	I	I	100	110	110	110	CNT	100	110	110	110	CNT	1		5	10
1	30	0	2		0	0	2	0	2	1		0.902949	1.16163	77.7312	95.981	106.664	66.7	26.3	2.53612		12	0.32	1	1	1,2	110	110	0	0	1	02954336	I	III	II	III	110	110	110	110	CNT	110	110	110	110	CNT	1		10	10
1	38	0	2		0	0	7	1	3	1		1.47217	1.09513	134.429	144.11	113.491	64.6	28.3	2.28269		5	0.33	1	1	1,2	105.833	98.3333	7.08661	7.5	1	10208731	II	III	I	I	95	110	110	110	CNT	95	95	105	110	CNT	0		10	10
1	15	0	1		0	0	6	1	4	2		1.16665	1.03853	112.337	100.501	144.664	90.7	8	11.3375		17	0.33	1	1	2,3	110	110	0	0	1	10437399	II	III	I	I	110	110	110	110	CNT	110	110	110	110	CNT	0		10	10
2	60	1	2	1	1	0	7	1	3	1		1.58902	0.922419	172.267	92.0774	97.5308	54	38	1.42105		9	0.33	1	1	1,2	66.6667	50	25	16.6667	1	05968132	I	III	II	II	70	70	60	55	16	65	55	35	25	48	1		15	15
2	14	0	1		0	0	5	1	4	2		1.13888	0.945306	120.477	106.711	121.237	62.4	31.3	1.99361		7	0.33	1	1	2	90.8333	49.1667	45.8716	41.6667	1	10356344	II	III	II	III	50	110	85	65	8	5	45	0	0	100	0		20	10
1	28	0	1		0	0	2	0	1	1		1.16391	1.00347	115.988	88.0793	96.648	72.6	20.9	3.47368		9	0.32	1	1	2	30.8333	14.1667	54.0541	16.6667	0	10125223	II	III	II	II	5	10	80	70	68	5	5	60	60	100	0		5	10
1	45	1	1		0	0	7	1	8			0.960424	1.47414	65.1515	140.771	165.721	51.4	37.5	1.37067		8	0.35				17.5	14.1667	19.0476	3.33333	1	09858439	I	I	I	II	15	5	65	85	100	10	10	45	70	100	1		10	5
2	42	1	1		0	0	4	1	5			1.0437	1.12644	92.654	125.132	104.346	54.7	36.5	1.49863		3	0.35				71.6667	9.16667	87.2093	62.5	0	09811238	I	III	I	I	85	70	55	50	48	5	5	5	0	100	1		15	20
1	36	0	1		0	0	2	0	3			0.786936	1.3999	56.2138	94.5544	74.6671	78.9	13.8	5.71739		2	0.35				54.1667	13.3333	75.3846	40.8333	0	09786123	I	III	I	III	60	60	35	20	84	5	5	0	5	100	1		5	5
1	30	0	2		0	0	1	0	2	1		0.978611	1.42792	68.5338	100.794	130.045	47.5	43.8	1.08447		8	0.35				110	110	0	0	1	09713358	I	II	I	III	110	110	110	110	CNT	110	110	110	110	CNT	1		5	5
1	44	1	2		0	0	7	1	8	1		1.06587	0.973741	109.461	105.742	103.917	58.8	28.5	2.06316		0	0.35				59.1667	61.6667	0	0	1	08192460	I	III	II	III	55	55	70	80	84	60	55	65	80	80	0		15	10
1	60	1	2	2	0	1	1	0	2	2		1.09497	0.684021	160.078	111.942	56.8766	70	21.3	3.28638		14	0.35				79.1667	26.6667	66.3158	52.5	0	09689385	I	I	I	III	90	80	75	70	CNT	20	10	35	35	100	1		20	10
1	53	1	2		0	0	2	0	3	2		0.919695	0.831709	110.579	97.4836	149.77	75.3	20.5	3.67317		2	0.35				101.667	51.6667	49.1803	50	1	09687714	I	III	I	III	110	105	100	105	CNT	20	30	80	75	88	1		20	30
2	46	1	1		0	0	2	0	3	1		1.01801	1.28504	79.2198	155.679	112.76	48.4	43.4	1.11521		5	0.35				110	110	0	0	1	09682461	I	IV	I	I	110	110	110	110	CNT	110	110	110	110	CNT	1		10	5
1	44	1	2		0	0	5	1	6	1		0.935261	0.919628	101.7	71.8213	68.8904	49.4	40.6	1.21675		2	0.35				97.5	28.3333	70.9402	69.1667	0	09682788	I	III	I	III	95	95	90	90	CNT	15	20	65	90	88	1		15	15
2	64	1	2		0	0	2	0	3	2		0.737925	1.00068	73.7422	96.65	105.173	86.2	12.7	6.7874		9	0.34				71.3333	24.1667	66.1215	47.1667	0	01026012	I	I	I	I	40	75	95	85	8	15	20	30	35	100	1		20	15
2	44	1	2		0	0	5	1	2	2		1.20054	1.29934	92.3957	93.9922	121.317	85.1	12.6	6.75397		7	0.34				32.5	7.5	76.9231	25	0	09579077	II	IV	II	III	55	35	20	30	80	15	10	10	30	100	0		0	5
2	59	1	2		0	0	4	1	2	1		1.04925	0.777158	135.011	179.495	115.127	77.5	19.9	3.89447		0	0.34				50.8333	42.5	16.3934	8.33333	1	03811083	I	III	I	III	60	55	35	35	80	40	30	30	45	100	0		5	10
1	35	0	1		0	0	4	1	3	2		1.29866	1.12856	115.073	97.9248	80.3239	87.9	8.4	10.4643		2	0.34				65.8333	41.6667	36.7089	24.1667	1	09573118	II	III	II	III	65	65	55	55	44	60	55	20	10	88	1		10	5
2	46	1	1		0	0	7	1	3	2		1.45879	1.08249	134.763	195.453	98.5842	84.2	12.9	6.52713		3	0.34				66.6667	66.6667	0	0	1	09569645	II	IV	II	III	65	65	65	55	56	65	70	65	25	48	0		5	10
1	64	1	1		0	0	7	1	4	2		2.05984	0.996375	206.733	728.341	99.6609	87	9.9	8.78788		3	0.34				53.3333	52.5	1.5625	0.833333	1	03094833	I	III	I	IV	65	55	55	50	76	55	45	40	40	84	1		15	40
1	41	1	2		0	0	7	1	3	2		1.49452	1.29145	115.724	112.714	117.663	87	10.6	8.20755		4	0.34				51.6667	21.6667	58.0645	30	0	09534416	II	IV	II	IV	55	60	45	30	76	50	50	40	25	100	1		5	10
2	60	1	2		0	0	1	0	1	1		1.1959	0.828586	144.33	132.501	106.793	76.7	19	4.03684		15	0.34				89.1667	57.5	35.514	31.6667	1	09519284	I	I	I	III	60	100	95	90	12	20	55	70	75	24	1		10	15
1	19	0	1		0	0	2	0	2	2		1.01336	1.16648	86.8731	98.4331	101.444	85.3	7.9	10.7975		2	0.32				110	10	90.9091	100	1	09500374	I	I	II	III	110	110	110	110	CNT	15	10	5	15	100	0		15	15
1	45	1	2		0	0	3	0	3	2		0.82496	1.02608	80.3992	105.077	121.024	54.6	36.8	1.4837		4	0.32				35	5	85.7143	30	0	01495005	I	IV	II	III	50	40	10	35	96	15	5	5	30	100	1		5	5
2	62	1	1		0	0	2	0	2	1		1.19118	0.904367	131.714	128.543	85.5913	88.4	11.2	7.89286		7	0.32				110	85	22.7273	25	1	09419346	I	II	I	I	110	110	110	110	CNT	80	85	95	90	32	1		10	10
2	33	0	2		0	0	2	0	2	2		1.26265	1.08714	116.144	138.173	82.8715	87.7	10.2	8.59804		5	0.32				20	8.33333	58.3333	11.6667	0	00159762	II	III	I	III	10	10	50	30	100	10	5	10	30	100	0		5	0
1	61	1	2	1,2	1	1	2	0	2	2		1.17823	0.827691	142.352	82.647	88.7995	56.2	32.1	1.75078		3	0.32				92.5	45	51.3514	47.5	1	08050939	II	IV	I	II	75	95	100	90	CNT	10	10	80	80	72	1		15	20
2	42	1	2		0	0	3	0	2	2		1.15864	1.13897	101.728	120.836	100.424	82.7	14.1	5.86525		6	0.32				74.1667	11.6667	84.2697	62.5	0	09386206	I	III	I	II	75	80	60	65	20	10	10	10	10	100	1		5	10
1	69	1	2	BPH	0	0	2	0	2	2		1.20877	0.831797	145.321	132.494	101.492	90	6.5	13.8462		5	0.32				70.8333	21.6667	69.4118	49.1667	0	09378250	I	III	II	III	75	75	80	65	8	15	15	65	70	96	1		10	15
2	61	1	1	1,2	1	1	7	1	2	2		1.01091	1.44927	69.7533	96.5363	109.121	57.9	32.8	1.76524		21	0.32				100	44.1667	55.8333	55.8333	1	00622493	I	II	II	IV	105	100	105	90	CNT	15	20	40	60	100	1		20	15
1	70	1	1	2	0	1	3	0	2	2		0.956866	1.00136	95.5569	133.669	141.775	59.4	29	2.04828		4	0.32				94.1667	82.5	12.3894	11.6667	1	04262196	III	III	II	II	105	95	85	90	CNT	100	85	75	85	CNT	1		40	55
1	58	1	1		0	0	7	1	2	1		0.892348	0.722341	123.536	178.191	108.954	56.4	31.9	1.76803		5	0.32				110	110	0	0	1	09341429	II	III	II	III	110	110	110	110	CNT	110	110	110	110	CNT	1		15	25
2	13	0	2		0	0	4	1	2	1		0.587168	1.2662	46.3724	117.755	140.679	80.4	13.2	6.09091		5	0.32				101.667	103.333	-1.63934	-1.66667	1	09308989	I	II	II	II	90	100	110	110	CNT	100	100	110	110	CNT	1		5	10
1	58	1	1		0	0	2	0	2	2		0.939373	1.03251	90.9799	91.1245	79.6479	55.8	34	1.64118		4	0.32				41.6667	29.1667	30	12.5	1	09191073	II	II	I	III	40	35	80	90	8	20	25	75	90	80	1		15	15
1	31	0	1		0	0	6	1	2	2		0.911319	1.11631	81.6369	108.901	92.9191	82.8	15.2	5.44737		2	0.32				79.1667	69.1667	12.6316	10	1	09297180	I	II	I	III	60	75	85	90	32	55	55	85	90	28	1		30	35
2	32	0	2		0	0	2	0	2	2		0.955858	1.44642	66.0846	113.667	122.474	79.6	17.6	4.52273		23	1.64				36.6667	17.5	52.2727	19.1667	0	09288991	I	III	I	I	35	35	35	35	100	10	10	10	25	96	1		10	5
1	45	1	2		0	0	2	0	1	1		1.4278	0.8577	166.468	105.732	203.304	79.7	15.4	5.17532		3	0.32				110	110	0	0	1	09274365	II	IV	II	III	110	110	110	110	CNT	110	110	110	110	CNT	1		15	5
1	48	1	1		0	0	2	0	2	2		1.36768	0.745699	183.409	134.021	155.628	42	49.6	0.846774		2	0.32				29.1667	7.5	74.2857	21.6667	0	03085480	I	III	I	II	25	25	40	40	92	10	5	15	35	100	1		10	5
2	47	1	2		0	0	4	1	2	2		1.264	1.33915	94.3888	128.012	96.3712	74.8	22.2	3.36937		0	2.30				39.1667	12.5	68.0851	26.6667	0	02610030	III	III	III	IV	40	55	35	25	84	5	0	25	25	96	0		5	5
2	43	1	1		0	0	2	0	2	2		0.869589	1.06952	81.3062	160.27	106.104	71	23.1	3.07359		23	0.32				90.8333	30.8333	66.055	60	1	09202050	II	III	I	III	85	95	80	80	CNT	10	15	20	35	100	1		15	10
																																				73.6735	76.9388	78.1633	77.1429		43.9796	45.3061	55.102	61.1224				11.5306	12.3469
												1.12597	1.07759	108.833	130.281	109.651			4.42565
												0.269052	0.200794	34.695	91.4422	26.1137			3.12188
Cahvada Rt	Gorie Rt	Cahvada Lt	Gorie Lt
I	III	II	III	1																											10202238
I	I	II	I	2																											09644971
I	I	II	III	2																											09094040
I	II	II	III	2																											10424805
II	III	II	II	1																											10125223
I	III	II	III	1																											10202238
II	II	II	III	1																											02360955
II	I	I	I	2																											10191004
I	III	II	III	2																											02954336
II	III	I	I	2																											10208731
II	III	I	I	1																											10437399
I	III	II	II	2																											05968132
II	III	II	III	1																											10356344
II	III	II	II	1																											10125223
I	I	I	II	1																											09858439
I	III	I	I	1																											09811238
I	III	I	III	1																											09786123
I	II	I	III	2																											09713358
I	III	II	III	2																											08192460
I	I	I	III	2																											09689385
I	III	I	III	2																											09687714
I	IV	I	I	1																											09682461
I	III	I	III	2																											09682788
I	I	I	I	2																											01026012
II	IV	II	III	2																											09579077
I	III	I	III	2																											03811083
II	III	II	III	1																											09573118
II	IV	II	III	1																											09569645
I	III	I	IV	1																											03094833
II	IV	II	IV	2																											09534416
I	I	I	III	2																											09519284
I	I	II	III	1																											09500374
I	IV	II	III	2																											01495005
I	II	I	I	1																											09419346
없음				1																											80241267
II	III	I	III	2																											00159762
II	IV	I	II	2																											08050939
I	III	I	II	2																											09386206
I	III	II	III	2																											09378250
I	II	II	IV	1																											00622493
III	III	II	II	1																											04262196
II	III	II	III	1																											09341429
I	II	II	II	2																											09308989
II	II	I	III	1																											09191073
I	II	I	III	1																											09297180
I	III	I	I	2																											09288991
II	IV	II	III	2																											09274365
I	III	I	II	1																											03085480
III	III	III	IV	2																											02610030
II	III	I	III	1																											09202050
[truncated: 8 more columns]

## Sheet: Chavda
	Cahvada	Pre 500	Pre 1000	Pre 4000	Pre 8000	Pre SRT	Post 500	Post 1000	Post 4000	Post 8000	Post SRT	Tinnitus	Cahvada	500	1000	4000	8000	SRT
	I	90	80	75	95	0	15	15	30	55	96	1	I	75	65	45	40	96
	I	40	75	95	85	8	15	20	30	35	100	1	I	25	55	65	50	92		38.6	34.1113
	I	100	110	110	110	0	100	110	110	110	0	1	I	0	0	0	0	0		20.4545	33.6264
	I	95	110	110	110	0	95	95	105	110	0	0	I	0	15	5	0	0		20	21.2132
	I	15	5	65	85	100	10	10	45	70	100	1	I	5	-5	20	15	0
	I	85	70	55	50	48	5	5	5	0	100	1	I	80	65	50	50	52
	I	60	60	35	20	84	5	5	0	5	100	1	I	55	55	35	15	16
	I	110	110	110	110	0	110	110	110	110	0	1	I	0	0	0	0	0		41.4	31.9022
	I	90	80	75	70	0	20	10	35	35	100	1	I	70	70	40	35	100		20.4545	32.5104
	I	110	105	100	105	0	20	30	80	75	88	1	I	90	75	20	30	88		32.5	31.8198
	I	110	110	110	110	0	110	110	110	110	0	1	I	0	0	0	0	0
	I	95	95	90	90	0	15	20	65	90	88	1	I	80	75	25	0	88
	I	40	75	95	85	8	15	20	30	35	100	1	I	25	55	65	50	92
	I	60	55	35	35	80	40	30	30	45	100	0	I	20	25	5	-10	20		30.4	26.0176
	I	65	55	55	50	76	55	45	40	40	84	1	I	10	10	15	10	8		15.9091	26.7099
	I	60	100	95	90	12	20	55	70	75	24	1	I	40	45	25	15	12		10	0
	I	110	110	110	110	0	15	10	5	15	100	0	I	95	100	105	95	100
	I	110	110	110	110	0	80	85	95	90	32	1	I	30	25	15	20	32
	I	10	10	50	30	100	10	5	10	30	100	0	I	0	5	40	0	0
	I	75	95	100	90	0	10	10	80	80	72	1	I	65	85	20	10	72		21	24.7066
	I	75	80	60	65	20	10	10	10	10	100	1	I	65	70	50	55	80		11.5909	23.1139
	I	105	100	105	90	0	15	20	40	60	100	1	I	90	80	65	30	100		2.5	3.53553
	I	60	75	85	90	32	55	55	85	90	28	1	I	5	20	0	0	-4
	I	35	35	35	35	100	10	10	10	25	96	1	I	25	25	25	10	-4
	I	25	25	40	40	92	10	5	15	35	100	1	I	15	20	25	5	8
	II	55	60	70	80	84	100	110	110	110	0	1	II	-45	-50	-40	-30	-84		41.92	42.8037
	II	110	110	110	110	0	110	110	110	110	0	1	II	0	0	0	0	0		31.8182	48.2924
	II	95	85	80	90	0	20	30	20	35	100	1	II	75	55	60	55	100		6	8.48528
	II	95	95	90	90	0	15	20	65	90	88	1	II	80	75	25	0	88
	II	80	80	75	75	0	15	20	40	75	100	1	II	65	60	35	0	100
	II	110	110	110	110	0	110	110	110	110	0	1	II	0	0	0	0	0
	II	110	110	110	110	0	110	110	110	110	0	0	II	0	0	0	0	0
	II	70	70	60	55	16	65	55	35	25	48	1	II	5	15	25	30	32
	II	50	110	85	65	8	5	45	0	0	100	0	II	45	65	85	65	92
	II	5	10	80	70	68	5	5	60	60	100	0	II	0	5	20	10	32
	II	55	55	70	80	84	60	55	65	80	80	0	II	-5	0	5	0	-4
	II	55	35	20	30	80	15	10	10	30	100	0	II	40	25	10	0	20
	II	65	65	55	55	44	60	55	20	10	88	1	II	5	10	35	45	44
	II	65	65	65	55	56	65	70	65	25	48	0	II	0	-5	0	30	-8
	II	55	60	45	30	76	50	50	40	25	100	1	II	5	10	5	5	24
	II	50	40	10	35	96	15	5	5	30	100	1	II	35	35	5	5	4
	II	75	75	80	65	8	15	15	65	70	96	1	II	60	60	15	-5	88
	II	110	110	110	110	0	110	110	110	110	0	1	II	0	0	0	0	0
	II	90	100	110	110	0	100	100	110	110	0	1	II	-10	0	0	0	0
	II	40	35	80	90	8	20	25	75	90	80	1	II	20	10	5	0	72
	II	110	110	110	110	0	110	110	110	110	0	1	II	0	0	0	0	0
	II	85	95	80	80	0	10	15	20	35	100	1	II	75	80	60	45	100
	III	105	95	85	90	0	100	85	75	85	0	1	III	5	10	10	5	0
	III	40	55	35	25	84	5	0	25	25	96	0	III	35	55	10	0	12

## Sheet: gorriee
	Gorie	Pre 500	Pre 1000	Pre 4000	Pre 8000	Pre SRT	Post 500	Post 1000	Post 4000	Post 8000	Post SRT	Tinnitus	Gorie	500	1000	4000	8000	SRT
	I	55	60	70	80	84	100	110	110	110	0	1	I	-45	-50	-40	-30	-84			15	42.3281
	I	100	110	110	110	0	100	110	110	110	0	1	I	0	0	0	0	0			37.2222	34.9205
	I	95	110	110	110	0	95	95	105	110	0	0	I	0	15	5	0	0			33.6207	33.1635
	I	15	5	65	85	100	10	10	45	70	100	1	I	5	-5	20	15	0			10	16.8325
	I	40	75	95	85	8	15	20	30	35	100	1	I	25	55	65	50	92
	I	110	110	110	110	0	15	10	5	15	100	0	I	95	100	105	95	100
	I	35	35	35	35	100	10	10	10	25	96	1	I	25	25	25	10	-4
	II	80	80	75	75	0	15	20	40	75	100	1	II	65	60	35	0	100			20	47.6095
	II	70	70	60	55	16	65	55	35	25	48	1	II	5	15	25	30	32			40.5556	32.9246
	II	110	110	110	110	0	80	85	95	90	32	1	II	30	25	15	20	32			33.9655	30.0707
	II	75	95	100	90	0	10	10	80	80	72	1	II	65	85	20	10	72			15	27.3861
	II	75	80	60	65	20	10	10	10	10	100	1	II	65	70	50	55	80
	II	105	100	105	90	0	15	20	40	60	100	1	II	90	80	65	30	100
	II	90	100	110	110	0	100	100	110	110	0	1	II	-10	0	0	0	0
	II	40	35	80	90	8	20	25	75	90	80	1	II	20	10	5	0	72			25.7143	47.0309
	II	60	75	85	90	32	55	55	85	90	28	1	II	5	20	0	0	-4			23.8889	22.6078
	III	90	80	75	95	0	15	15	30	55	96	1	III	75	65	45	40	96			24.8276	23.1255
	III	110	110	110	110	0	110	110	110	110	0	1	III	0	0	0	0	0			3.75	4.78714
	III	95	85	80	90	0	20	30	20	35	100	1	III	75	55	60	55	100
	III	95	95	90	90	0	15	20	65	90	88	1	III	80	75	25	0	88
	III	40	75	95	85	8	15	20	30	35	100	1	III	25	55	65	50	92
	III	110	110	110	110	0	110	110	110	110	0	1	III	0	0	0	0	0			20	40.7226
	III	110	110	110	110	0	110	110	110	110	0	0	III	0	0	0	0	0			16.1111	19.329
	III	50	110	85	65	8	5	45	0	0	100	0	III	45	65	85	65	92			16.0345	21.8918
	III	5	10	80	70	68	5	5	60	60	100	0	III	0	5	20	10	32			35	14.3614
	III	85	70	55	50	48	5	5	5	0	100	1	III	80	65	50	50	52
	III	60	60	35	20	84	5	5	0	5	100	1	III	55	55	35	15	16
	III	110	110	110	110	0	110	110	110	110	0	1	III	0	0	0	0	0
	III	55	55	70	80	84	60	55	65	80	80	0	III	-5	0	5	0	-4			14.8571	63.2335
	III	90	80	75	70	0	20	10	35	35	100	1	III	70	70	40	35	100			53.7778	40.0056
	III	110	105	100	105	0	20	30	80	75	88	1	III	90	75	20	30	88			39.4483	41.8395
	III	95	95	90	90	0	15	20	65	90	88	1	III	80	75	25	0	88			7	14
	III	55	35	20	30	80	15	10	10	30	100	0	III	40	25	10	0	20
	III	60	55	35	35	80	40	30	30	45	100	0	III	20	25	5	-10	20
	III	65	65	55	55	44	60	55	20	10	88	1	III	5	10	35	45	44
	III	65	55	55	50	76	55	45	40	40	84	1	III	10	10	15	10	8
	III	60	100	95	90	12	20	55	70	75	24	1	III	40	45	25	15	12
	III	50	40	10	35	96	15	5	5	30	100	1	III	35	35	5	5	4
	III	10	10	50	30	100	10	5	10	30	100	0	III	0	5	40	0	0
	III	75	75	80	65	8	15	15	65	70	96	1	III	60	60	15	-5	88
	III	105	95	85	90	0	100	85	75	85	0	1	III	5	10	10	5	0
	III	110	110	110	110	0	110	110	110	110	0	1	III	0	0	0	0	0
	III	110	110	110	110	0	110	110	110	110	0	1	III	0	0	0	0	0
	III	25	25	40	40	92	10	5	15	35	100	1	III	15	20	25	5	8
	III	85	95	80	80	0	10	15	20	35	100	1	III	75	80	60	45	100
	IV	110	110	110	110	0	110	110	110	110	0	1	IV	0	0	0	0	0
	IV	65	65	65	55	56	65	70	65	25	48	0	IV	0	-5	0	30	-8
	IV	55	60	45	30	76	50	50	40	25	100	1	IV	5	10	5	5	24
	IV	40	55	35	25	84	5	0	25	25	96	0	IV	35	55	10	0	12

## Sheet: tinnitus
	Cahvada Rt	Gorie Rt	Cahvada Lt	Gorie Lt	Pre 500	Pre 1000	Pre 4000	Pre 8000	Pre SRT	Post 500	Post 1000	Post 4000	Post 8000	Post SRT	Tinnitus
	II	III	I	I	95	110	110	110	CNT	95	95	105	110	CNT	0
	II	III	I	I	110	110	110	110	CNT	110	110	110	110	CNT	0
	II	III	II	III	50	110	85	65	8	5	45	0	0	100	0
	II	III	II	II	5	10	80	70	68	5	5	60	60	100	0
	I	III	II	III	55	55	70	80	84	60	55	65	80	80	0
	II	IV	II	III	55	35	20	30	80	15	10	10	30	100	0
	I	III	I	III	60	55	35	35	80	40	30	30	45	100	0
	II	IV	II	III	65	65	65	55	56	65	70	65	25	48	0
	I	I	II	III	110	110	110	110	CNT	15	10	5	15	100	0
	II	III	I	III	10	10	50	30	100	10	5	10	30	100	0
	III	III	III	IV	40	55	35	25	84	5	0	25	25	96	0
	I	III	II	III	90	80	75	95	CNT	15	15	30	55	96	1
	I	I	II	I	55	60	70	80	84	100	110	110	110	CNT	1
	I	I	II	III	110	110	110	110	CNT	110	110	110	110	CNT	1
	I	II	II	III	95	85	80	90	CNT	20	30	20	35	100	1
	II	III	II	II	95	95	90	90	CNT	15	20	65	90	88	1
	I	III	II	III	40	75	95	85	8	15	20	30	35	100	1
	II	II	II	III	80	80	75	75	CNT	15	20	40	75	100	1
	II	I	I	I	100	110	110	110	CNT	100	110	110	110	CNT	1
	I	III	II	III	110	110	110	110	CNT	110	110	110	110	CNT	1
	I	III	II	II	70	70	60	55	16	65	55	35	25	48	1
	I	I	I	II	15	5	65	85	100	10	10	45	70	100	1
	I	III	I	I	85	70	55	50	48	5	5	5	0	100	1
	I	III	I	III	60	60	35	20	84	5	5	0	5	100	1
	I	II	I	III	110	110	110	110	CNT	110	110	110	110	CNT	1
	I	I	I	III	90	80	75	70	CNT	20	10	35	35	100	1
	I	III	I	III	110	105	100	105	CNT	20	30	80	75	88	1
	I	IV	I	I	110	110	110	110	CNT	110	110	110	110	CNT	1
	I	III	I	III	95	95	90	90	CNT	15	20	65	90	88	1
	I	I	I	I	40	75	95	85	8	15	20	30	35	100	1
	II	III	II	III	65	65	55	55	44	60	55	20	10	88	1
	I	III	I	IV	65	55	55	50	76	55	45	40	40	84	1
	II	IV	II	IV	55	60	45	30	76	50	50	40	25	100	1
	I	I	I	III	60	100	95	90	12	20	55	70	75	24	1
	I	IV	II	III	50	40	10	35	96	15	5	5	30	100	1
	I	II	I	I	110	110	110	110	CNT	80	85	95	90	32	1
	II	IV	I	II	75	95	100	90	CNT	10	10	80	80	72	1
	I	III	I	II	75	80	60	65	20	10	10	10	10	100	1
	I	III	II	III	75	75	80	65	8	15	15	65	70	96	1
	I	II	II	IV	105	100	105	90	CNT	15	20	40	60	100	1
	III	III	II	II	105	95	85	90	CNT	100	85	75	85	CNT	1
	II	III	II	III	110	110	110	110	CNT	110	110	110	110	CNT	1
	I	II	II	II	90	100	110	110	CNT	100	100	110	110	CNT	1
	II	II	I	III	40	35	80	90	8	20	25	75	90	80	1
	I	II	I	III	60	75	85	90	32	55	55	85	90	28	1
	I	III	I	I	35	35	35	35	100	10	10	10	25	96	1
	II	IV	II	III	110	110	110	110	CNT	110	110	110	110	CNT	1
	I	III	I	II	25	25	40	40	92	10	5	15	35	100	1
	II	III	I	III	85	95	80	80	CNT	10	15	20	35	100	1
	없음

## Sheet: Vertigo
	Cahvada	gender	age		side	comobidity	DM	HTN	onset to MRI	duration	steroid to MRI	dizziness	ipsilateral = mm2	contralateral = mm2	relative ratio A	ipsilateral RR B	contralateral RR B	neu	lym	NLR	ESR	CRP	Viral lab	viral IG	virus type	Cahvada	initial hearing	post tx hearing	improve rate	delta dB	improvement btw 30~50%
	2	57	1	1	2	0	1	7	1	3	2		1.12376	1.0905	103.05	128.207	110.002	84	13.7	6.13139		23	0.33				79.1667	21.6667	72.6316	57.5	0	I	III	II	III
	1	17	0	2		0	0	2	0	2	2		1.74014	1.23622	140.763	107.884	91.7315	77.1	16.5	4.67273		2	0.34	1	1	1,2	67.5	108.333	0	0	1	I	I	II	I
	2	67	1	2	1,2,3	1	1	3	0	3	2		1.52515	1.03089	147.944	125.234	134.102	54.4	37.1	1.46631		21	0.33	1	1	1,2	82.5	22.5	72.7273	60	0	I	II	II	III
	1	28	0	1		0	0	2	0	1	2		0.879625	1.1807	74.5002	106.663	100.063	72.6	20.9	3.47368		9	0.32	1	1	2	32.5	14.1667	56.4103	18.3333	0	II	III	II	II
	2	57	1	1	2	0	1	7	1	3	2		1.04403	1.07091	97.4894	89.1667	107.856	84	13.7	6.13139		23	0.33	1	1	1,2	79.1667	21.6667	72.6316	57.5	0	I	III	II	III
	1	60	1	1		0	0	2	0	1	2		0.992585	0.995335	99.7238	178.63	75.1674	53.3	37.1	1.43666		23	0.33				77.5	22.5	70.9677	55	0	II	II	II	III
	1	36	0	2		0	0	4	1	3	2		1.11639	1.26003	88.6006	121.374	105.579	70.3	22.9	3.06987		14	0.32				108.333	105	3.07692	3.33333	1	II	I	I	I
	1	15	0	1		0	0	6	1	4	2		1.16665	1.03853	112.337	100.501	144.664	90.7	8	11.3375		17	0.33	1	1	2,3	110	110	0	0	1	II	III	I	I
	2	14	0	1		0	0	5	1	4	2		1.13888	0.945306	120.477	106.711	121.237	62.4	31.3	1.99361		7	0.33	1	1	2	90.8333	49.1667	45.8716	41.6667	1	II	III	II	III
	1	60	1	2	2	0	1	1	0	2	2		1.09497	0.684021	160.078	111.942	56.8766	70	21.3	3.28638		14	0.35				79.1667	26.6667	66.3158	52.5	0	I	I	I	III
	1	53	1	2		0	0	2	0	3	2		0.919695	0.831709	110.579	97.4836	149.77	75.3	20.5	3.67317		2	0.35				101.667	51.6667	49.1803	50	1	I	III	I	III
	2	64	1	2		0	0	2	0	3	2		0.737925	1.00068	73.7422	96.65	105.173	86.2	12.7	6.7874		9	0.34				71.3333	24.1667	66.1215	47.1667	0	I	I	I	I
	2	44	1	2		0	0	5	1	2	2		1.20054	1.29934	92.3957	93.9922	121.317	85.1	12.6	6.75397		7	0.34				32.5	7.5	76.9231	25	0	II	IV	II	III
	1	35	0	1		0	0	4	1	3	2		1.29866	1.12856	115.073	97.9248	80.3239	87.9	8.4	10.4643		2	0.34				65.8333	41.6667	36.7089	24.1667	1	II	III	II	III
	2	46	1	1		0	0	7	1	3	2		1.45879	1.08249	134.763	195.453	98.5842	84.2	12.9	6.52713		3	0.34				66.6667	66.6667	0	0	1	II	IV	II	III
	1	64	1	1		0	0	7	1	4	2		2.05984	0.996375	206.733	728.341	99.6609	87	9.9	8.78788		3	0.34				53.3333	52.5	1.5625	0.833333	1	I	III	I	IV
	1	41	1	2		0	0	7	1	3	2		1.49452	1.29145	115.724	112.714	117.663	87	10.6	8.20755		4	0.34				51.6667	21.6667	58.0645	30	0	II	IV	II	IV
	1	19	0	1		0	0	2	0	2	2		1.01336	1.16648	86.8731	98.4331	101.444	85.3	7.9	10.7975		2	0.32				110	10	90.9091	100	1	I	I	II	III
	1	45	1	2		0	0	3	0	3	2		0.82496	1.02608	80.3992	105.077	121.024	54.6	36.8	1.4837		4	0.32				35	5	85.7143	30	0	I	IV	II	III
	2	33	0	2		0	0	2	0	2	2		1.26265	1.08714	116.144	138.173	82.8715	87.7	10.2	8.59804		5	0.32				20	8.33333	58.3333	11.6667	0	II	III	I	III
	1	61	1	2	1,2	1	1	2	0	2	2		1.17823	0.827691	142.352	82.647	88.7995	56.2	32.1	1.75078		3	0.32				92.5	45	51.3514	47.5	1	II	IV	I	II
	2	42	1	2		0	0	3	0	2	2		1.15864	1.13897	101.728	120.836	100.424	82.7	14.1	5.86525		6	0.32				74.1667	11.6667	84.2697	62.5	0	I	III	I	II
	1	69	1	2	BPH	0	0	2	0	2	2		1.20877	0.831797	145.321	132.494	101.492	90	6.5	13.8462		5	0.32				70.8333	21.6667	69.4118	49.1667	0	I	III	II	III
	2	61	1	1	1,2	1	1	7	1	2	2		1.01091	1.44927	69.7533	96.5363	109.121	57.9	32.8	1.76524		21	0.32				100	44.1667	55.8333	55.8333	1	I	II	II	IV
	1	70	1	1	2	0	1	3	0	2	2		0.956866	1.00136	95.5569	133.669	141.775	59.4	29	2.04828		4	0.32				94.1667	82.5	12.3894	11.6667	1	III	III	II	II
	1	58	1	1		0	0	2	0	2	2		0.939373	1.03251	90.9799	91.1245	79.6479	55.8	34	1.64118		4	0.32				41.6667	29.1667	30	12.5	1	II	II	I	III
	1	31	0	1		0	0	6	1	2	2		0.911319	1.11631	81.6369	108.901	92.9191	82.8	15.2	5.44737		2	0.32				79.1667	69.1667	12.6316	10	1	I	II	I	III
	2	32	0	2		0	0	2	0	2	2		0.955858	1.44642	66.0846	113.667	122.474	79.6	17.6	4.52273		23	1.64				36.6667	17.5	52.2727	19.1667	0	I	III	I	I
	1	48	1	1		0	0	2	0	2	2		1.36768	0.745699	183.409	134.021	155.628	42	49.6	0.846774		2	0.32				29.1667	7.5	74.2857	21.6667	0	I	III	I	II
	2	47	1	2		0	0	4	1	2	2		1.264	1.33915	94.3888	128.012	96.3712	74.8	22.2	3.36937		0	2.30				39.1667	12.5	68.0851	26.6667	0	III	III	III	IV
	2	43	1	1		0	0	2	0	2	2		0.869589	1.06952	81.3062	160.27	106.104	71	23.1	3.07359		23	0.32				90.8333	30.8333	66.055	60	1	II	III	I	III

## Sheet: Not vertigo
	Cahvada	gender	age		side	comobidity	DM	HTN	onset to MRI	duration	steroid to MRI	dizziness	ipsilateral = mm2	contralateral = mm2	relative ratio A	ipsilateral RR B	contralateral RR B	neu	lym	NLR	ESR	CRP	Viral lab	viral IG	virus type	Cahvada	initial hearing	post tx hearing	improve rate	delta dB	improvement btw 30~50%
	1	48	1	2	1	1	0	1	0	3	1		0.997896	1.2148	82.1447	84.0981	117.925	77.9	15.7	4.96178		2	0.35				110	110	0	0	1	I	I	II	III
	1	30	0	2		0	0	2	0	2	1		0.902949	1.16163	77.7312	95.981	106.664	66.7	26.3	2.53612		12	0.32	1	1	1,2	110	110	0	0	1	I	III	II	III
	1	38	0	2		0	0	7	1	3	1		1.47217	1.09513	134.429	144.11	113.491	64.6	28.3	2.28269		5	0.33	1	1	1,2	105.833	98.3333	7.08661	7.5	1	II	III	I	I
	2	60	1	2	1	1	0	7	1	3	1		1.58902	0.922419	172.267	92.0774	97.5308	54	38	1.42105		9	0.33	1	1	1,2	66.6667	50	25	16.6667	1	I	III	II	II
	1	28	0	1		0	0	2	0	1	1		1.16391	1.00347	115.988	88.0793	96.648	72.6	20.9	3.47368		9	0.32	1	1	2	30.8333	14.1667	54.0541	16.6667	0	II	III	II	II
	1	45	1	1		0	0	7	1	8			0.960424	1.47414	65.1515	140.771	165.721	51.4	37.5	1.37067		8	0.35				17.5	14.1667	19.0476	3.33333	1	I	I	I	II
	2	42	1	1		0	0	4	1	5			1.0437	1.12644	92.654	125.132	104.346	54.7	36.5	1.49863		3	0.35				71.6667	9.16667	87.2093	62.5	0	I	III	I	I
	1	36	0	1		0	0	2	0	3			0.786936	1.3999	56.2138	94.5544	74.6671	78.9	13.8	5.71739		2	0.35				54.1667	13.3333	75.3846	40.8333	0	I	III	I	III
	1	30	0	2		0	0	1	0	2	1		0.978611	1.42792	68.5338	100.794	130.045	47.5	43.8	1.08447		8	0.35				110	110	0	0	1	I	II	I	III
	1	44	1	2		0	0	7	1	8	1		1.06587	0.973741	109.461	105.742	103.917	58.8	28.5	2.06316		0	0.35				59.1667	61.6667	0	0	1	I	III	II	III
	2	46	1	1		0	0	2	0	3	1		1.01801	1.28504	79.2198	155.679	112.76	48.4	43.4	1.11521		5	0.35				110	110	0	0	1	I	IV	I	I
	1	44	1	2		0	0	5	1	6	1		0.935261	0.919628	101.7	71.8213	68.8904	49.4	40.6	1.21675		2	0.35				97.5	28.3333	70.9402	69.1667	0	I	III	I	III
	2	59	1	2		0	0	4	1	2	1		1.04925	0.777158	135.011	179.495	115.127	77.5	19.9	3.89447		0	0.34				50.8333	42.5	16.3934	8.33333	1	I	III	I	III
	2	60	1	2		0	0	1	0	1	1		1.1959	0.828586	144.33	132.501	106.793	76.7	19	4.03684		15	0.34				89.1667	57.5	35.514	31.6667	1	I	I	I	III
	2	62	1	1		0	0	2	0	2	1		1.19118	0.904367	131.714	128.543	85.5913	88.4	11.2	7.89286		7	0.32				110	85	22.7273	25	1	I	II	I	I
	1	58	1	1		0	0	7	1	2	1		0.892348	0.722341	123.536	178.191	108.954	56.4	31.9	1.76803		5	0.32				110	110	0	0	1	II	III	II	III
	2	13	0	2		0	0	4	1	2	1		0.587168	1.2662	46.3724	117.755	140.679	80.4	13.2	6.09091		5	0.32				101.667	103.333	-1.63934	-1.66667	1	I	II	II	II
	1	45	1	2		0	0	2	0	1	1		1.4278	0.8577	166.468	105.732	203.304	79.7	15.4	5.17532		3	0.32				110	110	0	0	1	II	IV	II	III

## Sheet: Chavada ipsi
	Cahvada	gender	age		side	comobidity	DM	HTN	onset to MRI	duration	steroid to MRI	dizziness	ipsilateral = mm2	contralateral = mm2	relative ratio A	ipsilateral RR B	contralateral RR B	neu	lym	NLR	ESR	CRP	Viral lab	viral IG	virus type	Cahvada	initial hearing	post tx hearing	improve rate	delta dB	improvement btw 30~50%
	I	2	57	1	1	2	0	1	7	1	3	2	1.12376	1.0905	103.05	128.207	110.002	84	13.7	6.13139	23	0.33				I	79.1667	21.6667	72.6316	57.5	0
	I	2	57	1	1	2	0	1	7	1	3	2	1.04403	1.07091	97.4894	89.1667	107.856	84	13.7	6.13139	23	0.33	1	1	1,2	I	79.1667	21.6667	72.6316	57.5	0
	I	1	45	1	1		0	0	7	1	8		0.960424	1.47414	65.1515	140.771	165.721	51.4	37.5	1.37067	8	0.35				I	17.5	14.1667	19.0476	3.33333	1
	I	2	42	1	1		0	0	4	1	5		1.0437	1.12644	92.654	125.132	104.346	54.7	36.5	1.49863	3	0.35				I	71.6667	9.16667	87.2093	62.5	0
	I	1	36	0	1		0	0	2	0	3		0.786936	1.3999	56.2138	94.5544	74.6671	78.9	13.8	5.71739	2	0.35				I	54.1667	13.3333	75.3846	40.8333	0
	I	2	46	1	1		0	0	2	0	3	1	1.01801	1.28504	79.2198	155.679	112.76	48.4	43.4	1.11521	5	0.35				I	110	110	0	0	1
	I	1	64	1	1		0	0	7	1	4	2	2.05984	0.996375	206.733	728.341	99.6609	87	9.9	8.78788	3	0.34				I	53.3333	52.5	1.5625	0.833333	1
	I	1	19	0	1		0	0	2	0	2	2	1.01336	1.16648	86.8731	98.4331	101.444	85.3	7.9	10.7975	2	0.32				I	110	10	90.9091	100	1
	I	2	62	1	1		0	0	2	0	2	1	1.19118	0.904367	131.714	128.543	85.5913	88.4	11.2	7.89286	7	0.32				I	110	85	22.7273	25	1
	I	2	61	1	1	1,2	1	1	7	1	2	2	1.01091	1.44927	69.7533	96.5363	109.121	57.9	32.8	1.76524	21	0.32				I	100	44.1667	55.8333	55.8333	1
	I	1	31	0	1		0	0	6	1	2	2	0.911319	1.11631	81.6369	108.901	92.9191	82.8	15.2	5.44737	2	0.32				I	79.1667	69.1667	12.6316	10	1
	I	1	48	1	1		0	0	2	0	2	2	1.36768	0.745699	183.409	134.021	155.628	42	49.6	0.846774	2	0.32				I	29.1667	7.5	74.2857	21.6667	0
	I	1	36	0	2		0	0	4	1	3	2	1.11639	1.26003	88.6006	121.374	105.579	70.3	22.9	3.06987	14	0.32				I	108.333	105	3.07692	3.33333	1
	I	1	38	0	2		0	0	7	1	3	1	1.47217	1.09513	134.429	144.11	113.491	64.6	28.3	2.28269	5	0.33	1	1	1,2	I	105.833	98.3333	7.08661	7.5	1
	I	1	30	0	2		0	0	1	0	2	1	0.978611	1.42792	68.5338	100.794	130.045	47.5	43.8	1.08447	8	0.35				I	110	110	0	0	1
	I	1	60	1	2	2	0	1	1	0	2	2	1.09497	0.684021	160.078	111.942	56.8766	70	21.3	3.28638	14	0.35				I	79.1667	26.6667	66.3158	52.5	0
	I	1	53	1	2		0	0	2	0	3	2	0.919695	0.831709	110.579	97.4836	149.77	75.3	20.5	3.67317	2	0.35				I	101.667	51.6667	49.1803	50	1
	I	1	44	1	2		0	0	5	1	6	1	0.935261	0.919628	101.7	71.8213	68.8904	49.4	40.6	1.21675	2	0.35				I	97.5	28.3333	70.9402	69.1667	0
	I	2	64	1	2		0	0	2	0	3	2	0.737925	1.00068	73.7422	96.65	105.173	86.2	12.7	6.7874	9	0.34				I	71.3333	24.1667	66.1215	47.1667	0
	I	2	59	1	2		0	0	4	1	2	1	1.04925	0.777158	135.011	179.495	115.127	77.5	19.9	3.89447	0	0.34				I	50.8333	42.5	16.3934	8.33333	1
	I	2	60	1	2		0	0	1	0	1	1	1.1959	0.828586	144.33	132.501	106.793	76.7	19	4.03684	15	0.34				I	89.1667	57.5	35.514	31.6667	1
	I	2	33	0	2		0	0	2	0	2	2	1.26265	1.08714	116.144	138.173	82.8715	87.7	10.2	8.59804	5	0.32				I	20	8.33333	58.3333	11.6667	0
	I	1	61	1	2	1,2	1	1	2	0	2	2	1.17823	0.827691	142.352	82.647	88.7995	56.2	32.1	1.75078	3	0.32				I	92.5	45	51.3514	47.5	1
	I	2	42	1	2		0	0	3	0	2	2	1.15864	1.13897	101.728	120.836	100.424	82.7	14.1	5.86525	6	0.32				I	74.1667	11.6667	84.2697	62.5	0
	I	2	32	0	2		0	0	2	0	2	2	0.955858	1.44642	66.0846	113.667	122.474	79.6	17.6	4.52273	23	1.64				I	36.6667	17.5	52.2727	19.1667	0
	II	1	28	0	1		0	0	2	0	1	2	0.879625	1.1807	74.5002	106.663	100.063	72.6	20.9	3.47368	9	0.32	1	1	2	II	32.5	14.1667	56.4103	18.3333	0
	II	1	60	1	1		0	0	2	0	1	2	0.992585	0.995335	99.7238	178.63	75.1674	53.3	37.1	1.43666	23	0.33				II	77.5	22.5	70.9677	55	0
	II	1	15	0	1		0	0	6	1	4	2	1.16665	1.03853	112.337	100.501	144.664	90.7	8	11.3375	17	0.33	1	1	2,3	II	110	110	0	0	1
	II	2	14	0	1		0	0	5	1	4	2	1.13888	0.945306	120.477	106.711	121.237	62.4	31.3	1.99361	7	0.33	1	1	2	II	90.8333	49.1667	45.8716	41.6667	1
	II	1	28	0	1		0	0	2	0	1	1	1.16391	1.00347	115.988	88.0793	96.648	72.6	20.9	3.47368	9	0.32	1	1	2	II	30.8333	14.1667	54.0541	16.6667	0
	II	1	35	0	1		0	0	4	1	3	2	1.29866	1.12856	115.073	97.9248	80.3239	87.9	8.4	10.4643	2	0.34				II	65.8333	41.6667	36.7089	24.1667	1
	II	2	46	1	1		0	0	7	1	3	2	1.45879	1.08249	134.763	195.453	98.5842	84.2	12.9	6.52713	3	0.34				II	66.6667	66.6667	0	0	1
	II	1	58	1	1		0	0	7	1	2	1	0.892348	0.722341	123.536	178.191	108.954	56.4	31.9	1.76803	5	0.32				II	110	110	0	0	1
	II	1	58	1	1		0	0	2	0	2	2	0.939373	1.03251	90.9799	91.1245	79.6479	55.8	34	1.64118	4	0.32				II	41.6667	29.1667	30	12.5	1
	II	2	43	1	1		0	0	2	0	2	2	0.869589	1.06952	81.3062	160.27	106.104	71	23.1	3.07359	23	0.32				II	90.8333	30.8333	66.055	60	1
	II	1	17	0	2		0	0	2	0	2	2	1.74014	1.23622	140.763	107.884	91.7315	77.1	16.5	4.67273	2	0.34	1	1	1,2	II	67.5	108.333	0	0	1
	II	1	48	1	2	1	1	0	1	0	3	1	0.997896	1.2148	82.1447	84.0981	117.925	77.9	15.7	4.96178	2	0.35				II	110	110	0	0	1
	II	2	67	1	2	1,2,3	1	1	3	0	3	2	1.52515	1.03089	147.944	125.234	134.102	54.4	37.1	1.46631	21	0.33	1	1	1,2	II	82.5	22.5	72.7273	60	0
	II	1	30	0	2		0	0	2	0	2	1	0.902949	1.16163	77.7312	95.981	106.664	66.7	26.3	2.53612	12	0.32	1	1	1,2	II	110	110	0	0	1
	II	2	60	1	2	1	1	0	7	1	3	1	1.58902	0.922419	172.267	92.0774	97.5308	54	38	1.42105	9	0.33	1	1	1,2	II	66.6667	50	25	16.6667	1
	II	1	44	1	2		0	0	7	1	8	1	1.06587	0.973741	109.461	105.742	103.917	58.8	28.5	2.06316	0	0.35				II	59.1667	61.6667	0	0	1
	II	2	44	1	2		0	0	5	1	2	2	1.20054	1.29934	92.3957	93.9922	121.317	85.1	12.6	6.75397	7	0.34				II	32.5	7.5	76.9231	25	0
	II	1	41	1	2		0	0	7	1	3	2	1.49452	1.29145	115.724	112.714	117.663	87	10.6	8.20755	4	0.34				II	51.6667	21.6667	58.0645	30	0
	II	1	45	1	2		0	0	3	0	3	2	0.82496	1.02608	80.3992	105.077	121.024	54.6	36.8	1.4837	4	0.32				II	35	5	85.7143	30	0
	II	1	69	1	2	BPH	0	0	2	0	2	2	1.20877	0.831797	145.321	132.494	101.492	90	6.5	13.8462	5	0.32				II	70.8333	21.6667	69.4118	49.1667	0
	II	2	13	0	2		0	0	4	1	2	1	0.587168	1.2662	46.3724	117.755	140.679	80.4	13.2	6.09091	5	0.32				II	101.667	103.333	-1.63934	-1.66667	1
	II	1	45	1	2		0	0	2	0	1	1	1.4278	0.8577	166.468	105.732	203.304	79.7	15.4	5.17532	3	0.32				II	110	110	0	0	1
	III	1	70	1	1	2	0	1	3	0	2	2	0.956866	1.00136	95.5569	133.669	141.775	59.4	29	2.04828	4	0.32				III	94.1667	82.5	12.3894	11.6667	1
	III	2	47	1	2		0	0	4	1	2	2	1.264	1.33915	94.3888	128.012	96.3712	74.8	22.2	3.36937	0	2.30				III	39.1667	12.5	68.0851	26.6667	0

## Sheet: Gorrie ipsi
	Cahvada	gender	age		side	comobidity	DM	HTN	onset to MRI	duration	steroid to MRI	dizziness	ipsilateral = mm2	contralateral = mm2	relative ratio A	ipsilateral RR B	contralateral RR B	neu	lym	NLR	ESR	CRP	Viral lab	viral IG	virus type	Gorrie	initial hearing	post tx hearing	improve rate	delta dB	improvement btw 30~50%
	I	1	45	1	1		0	0	7	1	8		0.960424	1.47414	65.1515	140.771	165.721	51.4	37.5	1.37067	8	0.35				I	17.5	14.1667	19.0476	3.33333	1
	I	1	19	0	1		0	0	2	0	2	2	1.01336	1.16648	86.8731	98.4331	101.444	85.3	7.9	10.7975	2	0.32				I	110	10	90.9091	100	1
	I	1	17	0	2		0	0	2	0	2	2	1.74014	1.23622	140.763	107.884	91.7315	77.1	16.5	4.67273	2	0.34	1	1	1,2	I	67.5	108.333	0	0	1
	I	1	36	0	2		0	0	4	1	3	2	1.11639	1.26003	88.6006	121.374	105.579	70.3	22.9	3.06987	14	0.32				I	108.333	105	3.07692	3.33333	1
	I	1	38	0	2		0	0	7	1	3	1	1.47217	1.09513	134.429	144.11	113.491	64.6	28.3	2.28269	5	0.33	1	1	1,2	I	105.833	98.3333	7.08661	7.5	1
	I	2	64	1	2		0	0	2	0	3	2	0.737925	1.00068	73.7422	96.65	105.173	86.2	12.7	6.7874	9	0.34				I	71.3333	24.1667	66.1215	47.1667	0
	I	2	32	0	2		0	0	2	0	2	2	0.955858	1.44642	66.0846	113.667	122.474	79.6	17.6	4.52273	23	1.64				I	36.6667	17.5	52.2727	19.1667	0
	II	1	60	1	1		0	0	2	0	1	2	0.992585	0.995335	99.7238	178.63	75.1674	53.3	37.1	1.43666	23	0.33				II	77.5	22.5	70.9677	55	0
	II	2	62	1	1		0	0	2	0	2	1	1.19118	0.904367	131.714	128.543	85.5913	88.4	11.2	7.89286	7	0.32				II	110	85	22.7273	25	1
	II	2	61	1	1	1,2	1	1	7	1	2	2	1.01091	1.44927	69.7533	96.5363	109.121	57.9	32.8	1.76524	21	0.32				II	100	44.1667	55.8333	55.8333	1
	II	1	58	1	1		0	0	2	0	2	2	0.939373	1.03251	90.9799	91.1245	79.6479	55.8	34	1.64118	4	0.32				II	41.6667	29.1667	30	12.5	1
	II	1	31	0	1		0	0	6	1	2	2	0.911319	1.11631	81.6369	108.901	92.9191	82.8	15.2	5.44737	2	0.32				II	79.1667	69.1667	12.6316	10	1
	II	2	60	1	2	1	1	0	7	1	3	1	1.58902	0.922419	172.267	92.0774	97.5308	54	38	1.42105	9	0.33	1	1	1,2	II	66.6667	50	25	16.6667	1
	II	1	61	1	2	1,2	1	1	2	0	2	2	1.17823	0.827691	142.352	82.647	88.7995	56.2	32.1	1.75078	3	0.32				II	92.5	45	51.3514	47.5	1
	II	2	42	1	2		0	0	3	0	2	2	1.15864	1.13897	101.728	120.836	100.424	82.7	14.1	5.86525	6	0.32				II	74.1667	11.6667	84.2697	62.5	0
	II	2	13	0	2		0	0	4	1	2	1	0.587168	1.2662	46.3724	117.755	140.679	80.4	13.2	6.09091	5	0.32				II	101.667	103.333	-1.63934	-1.66667	1
	III	2	57	1	1	2	0	1	7	1	3	2	1.12376	1.0905	103.05	128.207	110.002	84	13.7	6.13139	23	0.33				III	79.1667	21.6667	72.6316	57.5	0
	III	1	28	0	1		0	0	2	0	1	2	0.879625	1.1807	74.5002	106.663	100.063	72.6	20.9	3.47368	9	0.32	1	1	2	III	32.5	14.1667	56.4103	18.3333	0
	III	2	57	1	1	2	0	1	7	1	3	2	1.04403	1.07091	97.4894	89.1667	107.856	84	13.7	6.13139	23	0.33	1	1	1,2	III	79.1667	21.6667	72.6316	57.5	0
	III	1	15	0	1		0	0	6	1	4	2	1.16665	1.03853	112.337	100.501	144.664	90.7	8	11.3375	17	0.33	1	1	2,3	III	110	110	0	0	1
	III	2	14	0	1		0	0	5	1	4	2	1.13888	0.945306	120.477	106.711	121.237	62.4	31.3	1.99361	7	0.33	1	1	2	III	90.8333	49.1667	45.8716	41.6667	1
	III	1	28	0	1		0	0	2	0	1	1	1.16391	1.00347	115.988	88.0793	96.648	72.6	20.9	3.47368	9	0.32	1	1	2	III	30.8333	14.1667	54.0541	16.6667	0
	III	2	42	1	1		0	0	4	1	5		1.0437	1.12644	92.654	125.132	104.346	54.7	36.5	1.49863	3	0.35				III	71.6667	9.16667	87.2093	62.5	0
	III	1	36	0	1		0	0	2	0	3		0.786936	1.3999	56.2138	94.5544	74.6671	78.9	13.8	5.71739	2	0.35				III	54.1667	13.3333	75.3846	40.8333	0
	III	1	35	0	1		0	0	4	1	3	2	1.29866	1.12856	115.073	97.9248	80.3239	87.9	8.4	10.4643	2	0.34				III	65.8333	41.6667	36.7089	24.1667	1
	III	1	64	1	1		0	0	7	1	4	2	2.05984	0.996375	206.733	728.341	99.6609	87	9.9	8.78788	3	0.34				III	53.3333	52.5	1.5625	0.833333	1
	III	1	70	1	1	2	0	1	3	0	2	2	0.956866	1.00136	95.5569	133.669	141.775	59.4	29	2.04828	4	0.32				III	94.1667	82.5	12.3894	11.6667	1
	III	1	58	1	1		0	0	7	1	2	1	0.892348	0.722341	123.536	178.191	108.954	56.4	31.9	1.76803	5	0.32				III	110	110	0	0	1
	III	1	48	1	1		0	0	2	0	2	2	1.36768	0.745699	183.409	134.021	155.628	42	49.6	0.846774	2	0.32				III	29.1667	7.5	74.2857	21.6667	0
	III	2	43	1	1		0	0	2	0	2	2	0.869589	1.06952	81.3062	160.27	106.104	71	23.1	3.07359	23	0.32				III	90.8333	30.8333	66.055	60	1
	III	1	48	1	2	1	1	0	1	0	3	1	0.997896	1.2148	82.1447	84.0981	117.925	77.9	15.7	4.96178	2	0.35				III	110	110	0	0	1
	III	2	67	1	2	1,2,3	1	1	3	0	3	2	1.52515	1.03089	147.944	125.234	134.102	54.4	37.1	1.46631	21	0.33	1	1	1,2	III	82.5	22.5	72.7273	60	0
	III	1	30	0	2		0	0	2	0	2	1	0.902949	1.16163	77.7312	95.981	106.664	66.7	26.3	2.53612	12	0.32	1	1	1,2	III	110	110	0	0	1
	III	1	30	0	2		0	0	1	0	2	1	0.978611	1.42792	68.5338	100.794	130.045	47.5	43.8	1.08447	8	0.35				III	110	110	0	0	1
	III	1	44	1	2		0	0	7	1	8	1	1.06587	0.973741	109.461	105.742	103.917	58.8	28.5	2.06316	0	0.35				III	59.1667	61.6667	0	0	1
	III	1	60	1	2	2	0	1	1	0	2	2	1.09497	0.684021	160.078	111.942	56.8766	70	21.3	3.28638	14	0.35				III	79.1667	26.6667	66.3158	52.5	0
	III	1	53	1	2		0	0	2	0	3	2	0.919695	0.831709	110.579	97.4836	149.77	75.3	20.5	3.67317	2	0.35				III	101.667	51.6667	49.1803	50	1
	III	1	44	1	2		0	0	5	1	6	1	0.935261	0.919628	101.7	71.8213	68.8904	49.4	40.6	1.21675	2	0.35				III	97.5	28.3333	70.9402	69.1667	0
	III	2	44	1	2		0	0	5	1	2	2	1.20054	1.29934	92.3957	93.9922	121.317	85.1	12.6	6.75397	7	0.34				III	32.5	7.5	76.9231	25	0
	III	2	59	1	2		0	0	4	1	2	1	1.04925	0.777158	135.011	179.495	115.127	77.5	19.9	3.89447	0	0.34				III	50.8333	42.5	16.3934	8.33333	1
	III	2	60	1	2		0	0	1	0	1	1	1.1959	0.828586	144.33	132.501	106.793	76.7	19	4.03684	15	0.34				III	89.1667	57.5	35.514	31.6667	1
	III	1	45	1	2		0	0	3	0	3	2	0.82496	1.02608	80.3992	105.077	121.024	54.6	36.8	1.4837	4	0.32				III	35	5	85.7143	30	0
	III	2	33	0	2		0	0	2	0	2	2	1.26265	1.08714	116.144	138.173	82.8715	87.7	10.2	8.59804	5	0.32				III	20	8.33333	58.3333	11.6667	0
	III	1	69	1	2	BPH	0	0	2	0	2	2	1.20877	0.831797	145.321	132.494	101.492	90	6.5	13.8462	5	0.32				III	70.8333	21.6667	69.4118	49.1667	0
	III	1	45	1	2		0	0	2	0	1	1	1.4278	0.8577	166.468	105.732	203.304	79.7	15.4	5.17532	3	0.32				III	110	110	0	0	1
	IV	2	46	1	1		0	0	2	0	3	1	1.01801	1.28504	79.2198	155.679	112.76	48.4	43.4	1.11521	5	0.35				IV	110	110	0	0	1
	IV	2	46	1	1		0	0	7	1	3	2	1.45879	1.08249	134.763	195.453	98.5842	84.2	12.9	6.52713	3	0.34				IV	66.6667	66.6667	0	0	1
	IV	1	41	1	2		0	0	7	1	3	2	1.49452	1.29145	115.724	112.714	117.663	87	10.6	8.20755	4	0.34				IV	51.6667	21.6667	58.0645	30	0
	IV	2	47	1	2		0	0	4	1	2	2	1.264	1.33915	94.3888	128.012	96.3712	74.8	22.2	3.36937	0	2.30				IV	39.1667	12.5	68.0851	26.6667	0

## Sheet: Cahvada.
	Cahvada	gender	age		side	comobidity	DM	HTN	onset to MRI	duration	steroid to MRI	dizziness	ipsilateral = mm2	contralateral = mm2	relative ratio A	ipsilateral RR B	contralateral RR B	neu	lym	NLR	ESR	CRP	Viral lab	viral IG	virus type	Gorrie	initial hearing	post tx hearing	improve rate	delta dB	improvement btw 30~50%
	I	2	57	1	1	2	0	1	7	1	3	2	1.12376	1.0905	103.05	128.207	110.002	84	13.7	6.13139	23	0.33				79.1667	21.6667	72.6316	57.5	0
	I	1	17	0	2		0	0	2	0	2	2	1.74014	1.23622	140.763	107.884	91.7315	77.1	16.5	4.67273	2	0.34	1	1	1,2	67.5	108.333	0	0	1
	I	1	48	1	2	1	1	0	1	0	3	1	0.997896	1.2148	82.1447	84.0981	117.925	77.9	15.7	4.96178	2	0.35				110	110	0	0	1
	I	2	67	1	2	1,2,3	1	1	3	0	3	2	1.52515	1.03089	147.944	125.234	134.102	54.4	37.1	1.46631	21	0.33	1	1	1,2	82.5	22.5	72.7273	60	0
	I	2	57	1	1	2	0	1	7	1	3	2	1.04403	1.07091	97.4894	89.1667	107.856	84	13.7	6.13139	23	0.33	1	1	1,2	79.1667	21.6667	72.6316	57.5	0
	I	1	30	0	2		0	0	2	0	2	1	0.902949	1.16163	77.7312	95.981	106.664	66.7	26.3	2.53612	12	0.32	1	1	1,2	110	110	0	0	1
	I	2	60	1	2	1	1	0	7	1	3	1	1.58902	0.922419	172.267	92.0774	97.5308	54	38	1.42105	9	0.33	1	1	1,2	66.6667	50	25	16.6667	1
	I	1	45	1	1		0	0	7	1	8		0.960424	1.47414	65.1515	140.771	165.721	51.4	37.5	1.37067	8	0.35				17.5	14.1667	19.0476	3.33333	1
	I	2	42	1	1		0	0	4	1	5		1.0437	1.12644	92.654	125.132	104.346	54.7	36.5	1.49863	3	0.35				71.6667	9.16667	87.2093	62.5	0
	I	1	36	0	1		0	0	2	0	3		0.786936	1.3999	56.2138	94.5544	74.6671	78.9	13.8	5.71739	2	0.35				54.1667	13.3333	75.3846	40.8333	0
	I	1	30	0	2		0	0	1	0	2	1	0.978611	1.42792	68.5338	100.794	130.045	47.5	43.8	1.08447	8	0.35				110	110	0	0	1
	I	1	44	1	2		0	0	7	1	8	1	1.06587	0.973741	109.461	105.742	103.917	58.8	28.5	2.06316	0	0.35				59.1667	61.6667	0	0	1
	I	1	60	1	2	2	0	1	1	0	2	2	1.09497	0.684021	160.078	111.942	56.8766	70	21.3	3.28638	14	0.35				79.1667	26.6667	66.3158	52.5	0
	I	1	53	1	2		0	0	2	0	3	2	0.919695	0.831709	110.579	97.4836	149.77	75.3	20.5	3.67317	2	0.35				101.667	51.6667	49.1803	50	1
	I	2	46	1	1		0	0	2	0	3	1	1.01801	1.28504	79.2198	155.679	112.76	48.4	43.4	1.11521	5	0.35				110	110	0	0	1
	I	1	44	1	2		0	0	5	1	6	1	0.935261	0.919628	101.7	71.8213	68.8904	49.4	40.6	1.21675	2	0.35				97.5	28.3333	70.9402	69.1667	0
	I	2	64	1	2		0	0	2	0	3	2	0.737925	1.00068	73.7422	96.65	105.173	86.2	12.7	6.7874	9	0.34				71.3333	24.1667	66.1215	47.1667	0
	I	2	59	1	2		0	0	4	1	2	1	1.04925	0.777158	135.011	179.495	115.127	77.5	19.9	3.89447	0	0.34				50.8333	42.5	16.3934	8.33333	1
	I	1	64	1	1		0	0	7	1	4	2	2.05984	0.996375	206.733	728.341	99.6609	87	9.9	8.78788	3	0.34				53.3333	52.5	1.5625	0.833333	1
	I	2	60	1	2		0	0	1	0	1	1	1.1959	0.828586	144.33	132.501	106.793	76.7	19	4.03684	15	0.34				89.1667	57.5	35.514	31.6667	1
	I	1	19	0	1		0	0	2	0	2	2	1.01336	1.16648	86.8731	98.4331	101.444	85.3	7.9	10.7975	2	0.32				110	10	90.9091	100	1
	I	1	45	1	2		0	0	3	0	3	2	0.82496	1.02608	80.3992	105.077	121.024	54.6	36.8	1.4837	4	0.32				35	5	85.7143	30	0
	I	2	62	1	1		0	0	2	0	2	1	1.19118	0.904367	131.714	128.543	85.5913	88.4	11.2	7.89286	7	0.32				110	85	22.7273	25	1
	I	2	42	1	2		0	0	3	0	2	2	1.15864	1.13897	101.728	120.836	100.424	82.7	14.1	5.86525	6	0.32				74.1667	11.6667	84.2697	62.5	0
	I	1	69	1	2	BPH	0	0	2	0	2	2	1.20877	0.831797	145.321	132.494	101.492	90	6.5	13.8462	5	0.32				70.8333	21.6667	69.4118	49.1667	0
	I	2	61	1	1	1,2	1	1	7	1	2	2	1.01091	1.44927	69.7533	96.5363	109.121	57.9	32.8	1.76524	21	0.32				100	44.1667	55.8333	55.8333	1
	I	2	13	0	2		0	0	4	1	2	1	0.587168	1.2662	46.3724	117.755	140.679	80.4	13.2	6.09091	5	0.32				101.667	103.333	-1.63934	-1.66667	1
	I	1	31	0	1		0	0	6	1	2	2	0.911319	1.11631	81.6369	108.901	92.9191	82.8	15.2	5.44737	2	0.32				79.1667	69.1667	12.6316	10	1
	I	2	32	0	2		0	0	2	0	2	2	0.955858	1.44642	66.0846	113.667	122.474	79.6	17.6	4.52273	23	1.64				36.6667	17.5	52.2727	19.1667	0
	I	1	48	1	1		0	0	2	0	2	2	1.36768	0.745699	183.409	134.021	155.628	42	49.6	0.846774	2	0.32				29.1667	7.5	74.2857	21.6667	0
	I	1	36	0	2		0	0	4	1	3	2	1.11639	1.26003	88.6006	121.374	105.579	70.3	22.9	3.06987	14	0.32				108.333	105	3.07692	3.33333	1
	I	1	38	0	2		0	0	7	1	3	1	1.47217	1.09513	134.429	144.11	113.491	64.6	28.3	2.28269	5	0.33	1	1	1,2	105.833	98.3333	7.08661	7.5	1
	I	1	15	0	1		0	0	6	1	4	2	1.16665	1.03853	112.337	100.501	144.664	90.7	8	11.3375	17	0.33	1	1	2,3	110	110	0	0	1
	I	1	45	1	1		0	0	7	1	8		0.960424	1.47414	65.1515	140.771	165.721	51.4	37.5	1.37067	8	0.35				17.5	14.1667	19.0476	3.33333	1
	I	2	42	1	1		0	0	4	1	5		1.0437	1.12644	92.654	125.132	104.346	54.7	36.5	1.49863	3	0.35				71.6667	9.16667	87.2093	62.5	0
	I	1	36	0	1		0	0	2	0	3		0.786936	1.3999	56.2138	94.5544	74.6671	78.9	13.8	5.71739	2	0.35				54.1667	13.3333	75.3846	40.8333	0
	I	1	30	0	2		0	0	1	0	2	1	0.978611	1.42792	68.5338	100.794	130.045	47.5	43.8	1.08447	8	0.35				110	110	0	0	1
	I	1	60	1	2	2	0	1	1	0	2	2	1.09497	0.684021	160.078	111.942	56.8766	70	21.3	3.28638	14	0.35				79.1667	26.6667	66.3158	52.5	0
	I	1	53	1	2		0	0	2	0	3	2	0.919695	0.831709	110.579	97.4836	149.77	75.3	20.5	3.67317	2	0.35				101.667	51.6667	49.1803	50	1
	I	2	46	1	1		0	0	2	0	3	1	1.01801	1.28504	79.2198	155.679	112.76	48.4	43.4	1.11521	5	0.35				110	110	0	0	1
	I	1	44	1	2		0	0	5	1	6	1	0.935261	0.919628	101.7	71.8213	68.8904	49.4	40.6	1.21675	2	0.35				97.5	28.3333	70.9402	69.1667	0
	I	2	64	1	2		0	0	2	0	3	2	0.737925	1.00068	73.7422	96.65	105.173	86.2	12.7	6.7874	9	0.34				71.3333	24.1667	66.1215	47.1667	0
	I	2	59	1	2		0	0	4	1	2	1	1.04925	0.777158	135.011	179.495	115.127	77.5	19.9	3.89447	0	0.34				50.8333	42.5	16.3934	8.33333	1
	I	1	64	1	1		0	0	7	1	4	2	2.05984	0.996375	206.733	728.341	99.6609	87	9.9	8.78788	3	0.34				53.3333	52.5	1.5625	0.833333	1
	I	2	60	1	2		0	0	1	0	1	1	1.1959	0.828586	144.33	132.501	106.793	76.7	19	4.03684	15	0.34				89.1667	57.5	35.514	31.6667	1
	I	2	62	1	1		0	0	2	0	2	1	1.19118	0.904367	131.714	128.543	85.5913	88.4	11.2	7.89286	7	0.32				110	85	22.7273	25	1
	I	2	33	0	2		0	0	2	0	2	2	1.26265	1.08714	116.144	138.173	82.8715	87.7	10.2	8.59804	5	0.32				20	8.33333	58.3333	11.6667	0
	I	1	61	1	2	1,2	1	1	2	0	2	2	1.17823	0.827691	142.352	82.647	88.7995	56.2	32.1	1.75078	3	0.32				92.5	45	51.3514	47.5	1
	I	2	42	1	2		0	0	3	0	2	2	1.15864	1.13897	101.728	120.836	100.424	82.7	14.1	5.86525	6	0.32				74.1667	11.6667	84.2697	62.5	0
	I	1	58	1	1		0	0	2	0	2	2	0.939373	1.03251	90.9799	91.1245	79.6479	55.8	34	1.64118	4	0.32				41.6667	29.1667	30	12.5	1
	I	1	31	0	1		0	0	6	1	2	2	0.911319	1.11631	81.6369	108.901	92.9191	82.8	15.2	5.44737	2	0.32				79.1667	69.1667	12.6316	10	1
	I	2	32	0	2		0	0	2	0	2	2	0.955858	1.44642	66.0846	113.667	122.474	79.6	17.6	4.52273	23	1.64				36.6667	17.5	52.2727	19.1667	0
	I	1	48	1	1		0	0	2	0	2	2	1.36768	0.745699	183.409	134.021	155.628	42	49.6	0.846774	2	0.32				29.1667	7.5	74.2857	21.6667	0
	I	2	43	1	1		0	0	2	0	2	2	0.869589	1.06952	81.3062	160.27	106.104	71	23.1	3.07359	23	0.32				90.8333	30.8333	66.055	60	1
	II	1	28	0	1		0	0	2	0	1	2	0.879625	1.1807	74.5002	106.663	100.063	72.6	20.9	3.47368	9	0.32	1	1	2	32.5	14.1667	56.4103	18.3333	0
	II	1	60	1	1		0	0	2	0	1	2	0.992585	0.995335	99.7238	178.63	75.1674	53.3	37.1	1.43666	23	0.33				77.5	22.5	70.9677	55	0
	II	1	36	0	2		0	0	4	1	3	2	1.11639	1.26003	88.6006	121.374	105.579	70.3	22.9	3.06987	14	0.32				108.333	105	3.07692	3.33333	1
	II	1	38	0	2		0	0	7	1	3	1	1.47217	1.09513	134.429	144.11	113.491	64.6	28.3	2.28269	5	0.33	1	1	1,2	105.833	98.3333	7.08661	7.5	1
	II	1	15	0	1		0	0	6	1	4	2	1.16665	1.03853	112.337	100.501	144.664	90.7	8	11.3375	17	0.33	1	1	2,3	110	110	0	0	1
	II	2	14	0	1		0	0	5	1	4	2	1.13888	0.945306	120.477	106.711	121.237	62.4	31.3	1.99361	7	0.33	1	1	2	90.8333	49.1667	45.8716	41.6667	1
	II	1	28	0	1		0	0	2	0	1	1	1.16391	1.00347	115.988	88.0793	96.648	72.6	20.9	3.47368	9	0.32	1	1	2	30.8333	14.1667	54.0541	16.6667	0
	II	2	44	1	2		0	0	5	1	2	2	1.20054	1.29934	92.3957	93.9922	121.317	85.1	12.6	6.75397	7	0.34				32.5	7.5	76.9231	25	0
	II	1	35	0	1		0	0	4	1	3	2	1.29866	1.12856	115.073	97.9248	80.3239	87.9	8.4	10.4643	2	0.34				65.8333	41.6667	36.7089	24.1667	1
	II	2	46	1	1		0	0	7	1	3	2	1.45879	1.08249	134.763	195.453	98.5842	84.2	12.9	6.52713	3	0.34				66.6667	66.6667	0	0	1
	II	1	41	1	2		0	0	7	1	3	2	1.49452	1.29145	115.724	112.714	117.663	87	10.6	8.20755	4	0.34				51.6667	21.6667	58.0645	30	0
	II	2	33	0	2		0	0	2	0	2	2	1.26265	1.08714	116.144	138.173	82.8715	87.7	10.2	8.59804	5	0.32				20	8.33333	58.3333	11.6667	0
	II	1	61	1	2	1,2	1	1	2	0	2	2	1.17823	0.827691	142.352	82.647	88.7995	56.2	32.1	1.75078	3	0.32				92.5	45	51.3514	47.5	1
	II	1	58	1	1		0	0	7	1	2	1	0.892348	0.722341	123.536	178.191	108.954	56.4	31.9	1.76803	5	0.32				110	110	0	0	1
	II	1	58	1	1		0	0	2	0	2	2	0.939373	1.03251	90.9799	91.1245	79.6479	55.8	34	1.64118	4	0.32				41.6667	29.1667	30	12.5	1
	II	1	45	1	2		0	0	2	0	1	1	1.4278	0.8577	166.468	105.732	203.304	79.7	15.4	5.17532	3	0.32				110	110	0	0	1
	II	2	43	1	1		0	0	2	0	2	2	0.869589	1.06952	81.3062	160.27	106.104	71	23.1	3.07359	23	0.32				90.8333	30.8333	66.055	60	1
	II	2	57	1	1	2	0	1	7	1	3	2	1.12376	1.0905	103.05	128.207	110.002	84	13.7	6.13139	23	0.33				79.1667	21.6667	72.6316	57.5	0
	II	1	17	0	2		0	0	2	0	2	2	1.74014	1.23622	140.763	107.884	91.7315	77.1	16.5	4.67273	2	0.34	1	1	1,2	67.5	108.333	0	0	1
	II	1	48	1	2	1	1	0	1	0	3	1	0.997896	1.2148	82.1447	84.0981	117.925	77.9	15.7	4.96178	2	0.35				110	110	0	0	1
	II	2	67	1	2	1,2,3	1	1	3	0	3	2	1.52515	1.03089	147.944	125.234	134.102	54.4	37.1	1.46631	21	0.33	1	1	1,2	82.5	22.5	72.7273	60	0
	II	1	28	0	1		0	0	2	0	1	2	0.879625	1.1807	74.5002	106.663	100.063	72.6	20.9	3.47368	9	0.32	1	1	2	32.5	14.1667	56.4103	18.3333	0
	II	2	57	1	1	2	0	1	7	1	3	2	1.04403	1.07091	97.4894	89.1667	107.856	84	13.7	6.13139	23	0.33	1	1	1,2	79.1667	21.6667	72.6316	57.5	0
	II	1	60	1	1		0	0	2	0	1	2	0.992585	0.995335	99.7238	178.63	75.1674	53.3	37.1	1.43666	23	0.33				77.5	22.5	70.9677	55	0
	II	1	30	0	2		0	0	2	0	2	1	0.902949	1.16163	77.7312	95.981	106.664	66.7	26.3	2.53612	12	0.32	1	1	1,2	110	110	0	0	1
	II	2	60	1	2	1	1	0	7	1	3	1	1.58902	0.922419	172.267	92.0774	97.5308	54	38	1.42105	9	0.33	1	1	1,2	66.6667	50	25	16.6667	1
	II	2	14	0	1		0	0	5	1	4	2	1.13888	0.945306	120.477	106.711	121.237	62.4	31.3	1.99361	7	0.33	1	1	2	90.8333	49.1667	45.8716	41.6667	1
	II	1	28	0	1		0	0	2	0	1	1	1.16391	1.00347	115.988	88.0793	96.648	72.6	20.9	3.47368	9	0.32	1	1	2	30.8333	14.1667	54.0541	16.6667	0
	II	1	44	1	2		0	0	7	1	8	1	1.06587	0.973741	109.461	105.742	103.917	58.8	28.5	2.06316	0	0.35				59.1667	61.6667	0	0	1
	II	2	44	1	2		0	0	5	1	2	2	1.20054	1.29934	92.3957	93.9922	121.317	85.1	12.6	6.75397	7	0.34				32.5	7.5	76.9231	25	0
	II	1	35	0	1		0	0	4	1	3	2	1.29866	1.12856	115.073	97.9248	80.3239	87.9	8.4	10.4643	2	0.34				65.8333	41.6667	36.7089	24.1667	1
	II	2	46	1	1		0	0	7	1	3	2	1.45879	1.08249	134.763	195.453	98.5842	84.2	12.9	6.52713	3	0.34				66.6667	66.6667	0	0	1
	II	1	41	1	2		0	0	7	1	3	2	1.49452	1.29145	115.724	112.714	117.663	87	10.6	8.20755	4	0.34				51.6667	21.6667	58.0645	30	0
	II	1	19	0	1		0	0	2	0	2	2	1.01336	1.16648	86.8731	98.4331	101.444	85.3	7.9	10.7975	2	0.32				110	10	90.9091	100	1
	II	1	45	1	2		0	0	3	0	3	2	0.82496	1.02608	80.3992	105.077	121.024	54.6	36.8	1.4837	4	0.32				35	5	85.7143	30	0
	II	1	69	1	2	BPH	0	0	2	0	2	2	1.20877	0.831797	145.321	132.494	101.492	90	6.5	13.8462	5	0.32				70.8333	21.6667	69.4118	49.1667	0
	II	2	61	1	1	1,2	1	1	7	1	2	2	1.01091	1.44927	69.7533	96.5363	109.121	57.9	32.8	1.76524	21	0.32				100	44.1667	55.8333	55.8333	1
	II	1	70	1	1	2	0	1	3	0	2	2	0.956866	1.00136	95.5569	133.669	141.775	59.4	29	2.04828	4	0.32				94.1667	82.5	12.3894	11.6667	1
	II	1	58	1	1		0	0	7	1	2	1	0.892348	0.722341	123.536	178.191	108.954	56.4	31.9	1.76803	5	0.32				110	110	0	0	1
	II	2	13	0	2		0	0	4	1	2	1	0.587168	1.2662	46.3724	117.755	140.679	80.4	13.2	6.09091	5	0.32				101.667	103.333	-1.63934	-1.66667	1
	II	1	45	1	2		0	0	2	0	1	1	1.4278	0.8577	166.468	105.732	203.304	79.7	15.4	5.17532	3	0.32				110	110	0	0	1
	III	1	70	1	1	2	0	1	3	0	2	2	0.956866	1.00136	95.5569	133.669	141.775	59.4	29	2.04828	4	0.32				94.1667	82.5	12.3894	11.6667	1
	III	2	47	1	2		0	0	4	1	2	2	1.264	1.33915	94.3888	128.012	96.3712	74.8	22.2	3.36937	0	2.30				39.1667	12.5	68.0851	26.6667	0
	III	2	47	1	2		0	0	4	1	2	2	1.264	1.33915	94.3888	128.012	96.3712	74.8	22.2	3.36937	0	2.30				39.1667	12.5	68.0851	26.6667	0

## Sheet: Gorrie
	Cahvada	gender	age		side	comobidity	DM	HTN	onset to MRI	duration	steroid to MRI	dizziness	ipsilateral = mm2	contralateral = mm2	relative ratio A	ipsilateral RR B	contralateral RR B	neu	lym	NLR	ESR	CRP	Viral lab	viral IG	virus type	Gorrie	initial hearing	post tx hearing	improve rate	delta dB	improvement btw 30~50%
	I	1	17	0	2		0	0	2	0	2	2	1.74014	1.23622	140.763	107.884	91.7315	77.1	16.5	4.67273	2	0.34	1	1	1,2	67.5	108.333	0	0	1
	I	1	48	1	2	1	1	0	1	0	3	1	0.997896	1.2148	82.1447	84.0981	117.925	77.9	15.7	4.96178	2	0.35				110	110	0	0	1
	I	1	36	0	2		0	0	4	1	3	2	1.11639	1.26003	88.6006	121.374	105.579	70.3	22.9	3.06987	14	0.32				108.333	105	3.07692	3.33333	1
	I	1	45	1	1		0	0	7	1	8		0.960424	1.47414	65.1515	140.771	165.721	51.4	37.5	1.37067	8	0.35				17.5	14.1667	19.0476	3.33333	1
	I	1	60	1	2	2	0	1	1	0	2	2	1.09497	0.684021	160.078	111.942	56.8766	70	21.3	3.28638	14	0.35				79.1667	26.6667	66.3158	52.5	0
	I	2	64	1	2		0	0	2	0	3	2	0.737925	1.00068	73.7422	96.65	105.173	86.2	12.7	6.7874	9	0.34				71.3333	24.1667	66.1215	47.1667	0
	I	2	60	1	2		0	0	1	0	1	1	1.1959	0.828586	144.33	132.501	106.793	76.7	19	4.03684	15	0.34				89.1667	57.5	35.514	31.6667	1
	I	1	19	0	1		0	0	2	0	2	2	1.01336	1.16648	86.8731	98.4331	101.444	85.3	7.9	10.7975	2	0.32				110	10	90.9091	100	1
	I	1	17	0	2		0	0	2	0	2	2	1.74014	1.23622	140.763	107.884	91.7315	77.1	16.5	4.67273	2	0.34	1	1	1,2	67.5	108.333	0	0	1
	I	1	36	0	2		0	0	4	1	3	2	1.11639	1.26003	88.6006	121.374	105.579	70.3	22.9	3.06987	14	0.32				108.333	105	3.07692	3.33333	1
	I	1	38	0	2		0	0	7	1	3	1	1.47217	1.09513	134.429	144.11	113.491	64.6	28.3	2.28269	5	0.33	1	1	1,2	105.833	98.3333	7.08661	7.5	1
	I	1	15	0	1		0	0	6	1	4	2	1.16665	1.03853	112.337	100.501	144.664	90.7	8	11.3375	17	0.33	1	1	2,3	110	110	0	0	1
	I	2	42	1	1		0	0	4	1	5		1.0437	1.12644	92.654	125.132	104.346	54.7	36.5	1.49863	3	0.35				71.6667	9.16667	87.2093	62.5	0
	I	2	46	1	1		0	0	2	0	3	1	1.01801	1.28504	79.2198	155.679	112.76	48.4	43.4	1.11521	5	0.35				110	110	0	0	1
	I	2	64	1	2		0	0	2	0	3	2	0.737925	1.00068	73.7422	96.65	105.173	86.2	12.7	6.7874	9	0.34				71.3333	24.1667	66.1215	47.1667	0
	I	2	62	1	1		0	0	2	0	2	1	1.19118	0.904367	131.714	128.543	85.5913	88.4	11.2	7.89286	7	0.32				110	85	22.7273	25	1
	I	2	32	0	2		0	0	2	0	2	2	0.955858	1.44642	66.0846	113.667	122.474	79.6	17.6	4.52273	23	1.64				36.6667	17.5	52.2727	19.1667	0
	II	2	67	1	2	1,2,3	1	1	3	0	3	2	1.52515	1.03089	147.944	125.234	134.102	54.4	37.1	1.46631	21	0.33	1	1	1,2	82.5	22.5	72.7273	60	0
	II	1	60	1	1		0	0	2	0	1	2	0.992585	0.995335	99.7238	178.63	75.1674	53.3	37.1	1.43666	23	0.33				77.5	22.5	70.9677	55	0
	II	1	30	0	2		0	0	1	0	2	1	0.978611	1.42792	68.5338	100.794	130.045	47.5	43.8	1.08447	8	0.35				110	110	0	0	1
	II	2	62	1	1		0	0	2	0	2	1	1.19118	0.904367	131.714	128.543	85.5913	88.4	11.2	7.89286	7	0.32				110	85	22.7273	25	1
	II	2	61	1	1	1,2	1	1	7	1	2	2	1.01091	1.44927	69.7533	96.5363	109.121	57.9	32.8	1.76524	21	0.32				100	44.1667	55.8333	55.8333	1
	II	2	13	0	2		0	0	4	1	2	1	0.587168	1.2662	46.3724	117.755	140.679	80.4	13.2	6.09091	5	0.32				101.667	103.333	-1.63934	-1.66667	1
	II	1	58	1	1		0	0	2	0	2	2	0.939373	1.03251	90.9799	91.1245	79.6479	55.8	34	1.64118	4	0.32				41.6667	29.1667	30	12.5	1
	II	1	31	0	1		0	0	6	1	2	2	0.911319	1.11631	81.6369	108.901	92.9191	82.8	15.2	5.44737	2	0.32				79.1667	69.1667	12.6316	10	1
	II	1	28	0	1		0	0	2	0	1	2	0.879625	1.1807	74.5002	106.663	100.063	72.6	20.9	3.47368	9	0.32	1	1	2	32.5	14.1667	56.4103	18.3333	0
	II	2	60	1	2	1	1	0	7	1	3	1	1.58902	0.922419	172.267	92.0774	97.5308	54	38	1.42105	9	0.33	1	1	1,2	66.6667	50	25	16.6667	1
	II	1	28	0	1		0	0	2	0	1	1	1.16391	1.00347	115.988	88.0793	96.648	72.6	20.9	3.47368	9	0.32	1	1	2	30.8333	14.1667	54.0541	16.6667	0
	II	1	45	1	1		0	0	7	1	8		0.960424	1.47414	65.1515	140.771	165.721	51.4	37.5	1.37067	8	0.35				17.5	14.1667	19.0476	3.33333	1
	II	1	61	1	2	1,2	1	1	2	0	2	2	1.17823	0.827691	142.352	82.647	88.7995	56.2	32.1	1.75078	3	0.32				92.5	45	51.3514	47.5	1
	II	2	42	1	2		0	0	3	0	2	2	1.15864	1.13897	101.728	120.836	100.424	82.7	14.1	5.86525	6	0.32				74.1667	11.6667	84.2697	62.5	0
	II	1	70	1	1	2	0	1	3	0	2	2	0.956866	1.00136	95.5569	133.669	141.775	59.4	29	2.04828	4	0.32				94.1667	82.5	12.3894	11.6667	1
	II	2	13	0	2		0	0	4	1	2	1	0.587168	1.2662	46.3724	117.755	140.679	80.4	13.2	6.09091	5	0.32				101.667	103.333	-1.63934	-1.66667	1
	II	1	48	1	1		0	0	2	0	2	2	1.36768	0.745699	183.409	134.021	155.628	42	49.6	0.846774	2	0.32				29.1667	7.5	74.2857	21.6667	0
	III	2	57	1	1	2	0	1	7	1	3	2	1.12376	1.0905	103.05	128.207	110.002	84	13.7	6.13139	23	0.33				79.1667	21.6667	72.6316	57.5	0
	III	1	28	0	1		0	0	2	0	1	2	0.879625	1.1807	74.5002	106.663	100.063	72.6	20.9	3.47368	9	0.32	1	1	2	32.5	14.1667	56.4103	18.3333	0
	III	2	57	1	1	2	0	1	7	1	3	2	1.04403	1.07091	97.4894	89.1667	107.856	84	13.7	6.13139	23	0.33	1	1	1,2	79.1667	21.6667	72.6316	57.5	0
	III	1	30	0	2		0	0	2	0	2	1	0.902949	1.16163	77.7312	95.981	106.664	66.7	26.3	2.53612	12	0.32	1	1	1,2	110	110	0	0	1
	III	1	38	0	2		0	0	7	1	3	1	1.47217	1.09513	134.429	144.11	113.491	64.6	28.3	2.28269	5	0.33	1	1	1,2	105.833	98.3333	7.08661	7.5	1
	III	1	15	0	1		0	0	6	1	4	2	1.16665	1.03853	112.337	100.501	144.664	90.7	8	11.3375	17	0.33	1	1	2,3	110	110	0	0	1
	III	2	60	1	2	1	1	0	7	1	3	1	1.58902	0.922419	172.267	92.0774	97.5308	54	38	1.42105	9	0.33	1	1	1,2	66.6667	50	25	16.6667	1
	III	2	14	0	1		0	0	5	1	4	2	1.13888	0.945306	120.477	106.711	121.237	62.4	31.3	1.99361	7	0.33	1	1	2	90.8333	49.1667	45.8716	41.6667	1
	III	1	28	0	1		0	0	2	0	1	1	1.16391	1.00347	115.988	88.0793	96.648	72.6	20.9	3.47368	9	0.32	1	1	2	30.8333	14.1667	54.0541	16.6667	0
	III	2	42	1	1		0	0	4	1	5		1.0437	1.12644	92.654	125.132	104.346	54.7	36.5	1.49863	3	0.35				71.6667	9.16667	87.2093	62.5	0
	III	1	36	0	1		0	0	2	0	3		0.786936	1.3999	56.2138	94.5544	74.6671	78.9	13.8	5.71739	2	0.35				54.1667	13.3333	75.3846	40.8333	0
	III	1	44	1	2		0	0	7	1	8	1	1.06587	0.973741	109.461	105.742	103.917	58.8	28.5	2.06316	0	0.35				59.1667	61.6667	0	0	1
	III	1	53	1	2		0	0	2	0	3	2	0.919695	0.831709	110.579	97.4836	149.77	75.3	20.5	3.67317	2	0.35				101.667	51.6667	49.1803	50	1
	III	1	44	1	2		0	0	5	1	6	1	0.935261	0.919628	101.7	71.8213	68.8904	49.4	40.6	1.21675	2	0.35				97.5	28.3333	70.9402	69.1667	0
	III	2	59	1	2		0	0	4	1	2	1	1.04925	0.777158	135.011	179.495	115.127	77.5	19.9	3.89447	0	0.34				50.8333	42.5	16.3934	8.33333	1
	III	1	35	0	1		0	0	4	1	3	2	1.29866	1.12856	115.073	97.9248	80.3239	87.9	8.4	10.4643	2	0.34				65.8333	41.6667	36.7089	24.1667	1
	III	1	64	1	1		0	0	7	1	4	2	2.05984	0.996375	206.733	728.341	99.6609	87	9.9	8.78788	3	0.34				53.3333	52.5	1.5625	0.833333	1
	III	2	33	0	2		0	0	2	0	2	2	1.26265	1.08714	116.144	138.173	82.8715	87.7	10.2	8.59804	5	0.32				20	8.33333	58.3333	11.6667	0
	III	2	42	1	2		0	0	3	0	2	2	1.15864	1.13897	101.728	120.836	100.424	82.7	14.1	5.86525	6	0.32				74.1667	11.6667	84.2697	62.5	0
	III	1	69	1	2	BPH	0	0	2	0	2	2	1.20877	0.831797	145.321	132.494	101.492	90	6.5	13.8462	5	0.32				70.8333	21.6667	69.4118	49.1667	0
	III	1	70	1	1	2	0	1	3	0	2	2	0.956866	1.00136	95.5569	133.669	141.775	59.4	29	2.04828	4	0.32				94.1667	82.5	12.3894	11.6667	1
	III	1	58	1	1		0	0	7	1	2	1	0.892348	0.722341	123.536	178.191	108.954	56.4	31.9	1.76803	5	0.32				110	110	0	0	1
	III	2	32	0	2		0	0	2	0	2	2	0.955858	1.44642	66.0846	113.667	122.474	79.6	17.6	4.52273	23	1.64				36.6667	17.5	52.2727	19.1667	0
	III	1	48	1	1		0	0	2	0	2	2	1.36768	0.745699	183.409	134.021	155.628	42	49.6	0.846774	2	0.32				29.1667	7.5	74.2857	21.6667	0
	III	2	47	1	2		0	0	4	1	2	2	1.264	1.33915	94.3888	128.012	96.3712	74.8	22.2	3.36937	0	2.30				39.1667	12.5	68.0851	26.6667	0
	III	2	43	1	1		0	0	2	0	2	2	0.869589	1.06952	81.3062	160.27	106.104	71	23.1	3.07359	23	0.32				90.8333	30.8333	66.055	60	1
	III	2	57	1	1	2	0	1	7	1	3	2	1.12376	1.0905	103.05	128.207	110.002	84	13.7	6.13139	23	0.33				79.1667	21.6667	72.6316	57.5	0
	III	1	48	1	2	1	1	0	1	0	3	1	0.997896	1.2148	82.1447	84.0981	117.925	77.9	15.7	4.96178	2	0.35				110	110	0	0	1
	III	2	67	1	2	1,2,3	1	1	3	0	3	2	1.52515	1.03089	147.944	125.234	134.102	54.4	37.1	1.46631	21	0.33	1	1	1,2	82.5	22.5	72.7273	60	0
	III	2	57	1	1	2	0	1	7	1	3	2	1.04403	1.07091	97.4894	89.1667	107.856	84	13.7	6.13139	23	0.33	1	1	1,2	79.1667	21.6667	72.6316	57.5	0
	III	1	60	1	1		0	0	2	0	1	2	0.992585	0.995335	99.7238	178.63	75.1674	53.3	37.1	1.43666	23	0.33				77.5	22.5	70.9677	55	0
	III	1	30	0	2		0	0	2	0	2	1	0.902949	1.16163	77.7312	95.981	106.664	66.7	26.3	2.53612	12	0.32	1	1	1,2	110	110	0	0	1
	III	2	14	0	1		0	0	5	1	4	2	1.13888	0.945306	120.477	106.711	121.237	62.4	31.3	1.99361	7	0.33	1	1	2	90.8333	49.1667	45.8716	41.6667	1
	III	1	36	0	1		0	0	2	0	3		0.786936	1.3999	56.2138	94.5544	74.6671	78.9	13.8	5.71739	2	0.35				54.1667	13.3333	75.3846	40.8333	0
	III	1	30	0	2		0	0	1	0	2	1	0.978611	1.42792	68.5338	100.794	130.045	47.5	43.8	1.08447	8	0.35				110	110	0	0	1
	III	1	44	1	2		0	0	7	1	8	1	1.06587	0.973741	109.461	105.742	103.917	58.8	28.5	2.06316	0	0.35				59.1667	61.6667	0	0	1
	III	1	60	1	2	2	0	1	1	0	2	2	1.09497	0.684021	160.078	111.942	56.8766	70	21.3	3.28638	14	0.35				79.1667	26.6667	66.3158	52.5	0
	III	1	53	1	2		0	0	2	0	3	2	0.919695	0.831709	110.579	97.4836	149.77	75.3	20.5	3.67317	2	0.35				101.667	51.6667	49.1803	50	1
	III	1	44	1	2		0	0	5	1	6	1	0.935261	0.919628	101.7	71.8213	68.8904	49.4	40.6	1.21675	2	0.35				97.5	28.3333	70.9402	69.1667	0
	III	2	44	1	2		0	0	5	1	2	2	1.20054	1.29934	92.3957	93.9922	121.317	85.1	12.6	6.75397	7	0.34				32.5	7.5	76.9231	25	0
	III	2	59	1	2		0	0	4	1	2	1	1.04925	0.777158	135.011	179.495	115.127	77.5	19.9	3.89447	0	0.34				50.8333	42.5	16.3934	8.33333	1
	III	1	35	0	1		0	0	4	1	3	2	1.29866	1.12856	115.073	97.9248	80.3239	87.9	8.4	10.4643	2	0.34				65.8333	41.6667	36.7089	24.1667	1
	III	2	46	1	1		0	0	7	1	3	2	1.45879	1.08249	134.763	195.453	98.5842	84.2	12.9	6.52713	3	0.34				66.6667	66.6667	0	0	1
	III	2	60	1	2		0	0	1	0	1	1	1.1959	0.828586	144.33	132.501	106.793	76.7	19	4.03684	15	0.34				89.1667	57.5	35.514	31.6667	1
	III	1	19	0	1		0	0	2	0	2	2	1.01336	1.16648	86.8731	98.4331	101.444	85.3	7.9	10.7975	2	0.32				110	10	90.9091	100	1
	III	1	45	1	2		0	0	3	0	3	2	0.82496	1.02608	80.3992	105.077	121.024	54.6	36.8	1.4837	4	0.32				35	5	85.7143	30	0
	III	2	33	0	2		0	0	2	0	2	2	1.26265	1.08714	116.144	138.173	82.8715	87.7	10.2	8.59804	5	0.32				20	8.33333	58.3333	11.6667	0
	III	1	69	1	2	BPH	0	0	2	0	2	2	1.20877	0.831797	145.321	132.494	101.492	90	6.5	13.8462	5	0.32				70.8333	21.6667	69.4118	49.1667	0
	III	1	58	1	1		0	0	7	1	2	1	0.892348	0.722341	123.536	178.191	108.954	56.4	31.9	1.76803	5	0.32				110	110	0	0	1
	III	1	58	1	1		0	0	2	0	2	2	0.939373	1.03251	90.9799	91.1245	79.6479	55.8	34	1.64118	4	0.32				41.6667	29.1667	30	12.5	1
	III	1	31	0	1		0	0	6	1	2	2	0.911319	1.11631	81.6369	108.901	92.9191	82.8	15.2	5.44737	2	0.32				79.1667	69.1667	12.6316	10	1
	III	1	45	1	2		0	0	2	0	1	1	1.4278	0.8577	166.468	105.732	203.304	79.7	15.4	5.17532	3	0.32				110	110	0	0	1
	III	2	43	1	1		0	0	2	0	2	2	0.869589	1.06952	81.3062	160.27	106.104	71	23.1	3.07359	23	0.32				90.8333	30.8333	66.055	60	1
	IV	2	46	1	1		0	0	2	0	3	1	1.01801	1.28504	79.2198	155.679	112.76	48.4	43.4	1.11521	5	0.35				110	110	0	0	1
	IV	2	44	1	2		0	0	5	1	2	2	1.20054	1.29934	92.3957	93.9922	121.317	85.1	12.6	6.75397	7	0.34				32.5	7.5	76.9231	25	0
	IV	2	46	1	1		0	0	7	1	3	2	1.45879	1.08249	134.763	195.453	98.5842	84.2	12.9	6.52713	3	0.34				66.6667	66.6667	0	0	1
	IV	1	41	1	2		0	0	7	1	3	2	1.49452	1.29145	115.724	112.714	117.663	87	10.6	8.20755	4	0.34				51.6667	21.6667	58.0645	30	0
	IV	1	45	1	2		0	0	3	0	3	2	0.82496	1.02608	80.3992	105.077	121.024	54.6	36.8	1.4837	4	0.32				35	5	85.7143	30	0
	IV	1	61	1	2	1,2	1	1	2	0	2	2	1.17823	0.827691	142.352	82.647	88.7995	56.2	32.1	1.75078	3	0.32				92.5	45	51.3514	47.5	1
	IV	1	45	1	2		0	0	2	0	1	1	1.4278	0.8577	166.468	105.732	203.304	79.7	15.4	5.17532	3	0.32				110	110	0	0	1
	IV	1	64	1	1		0	0	7	1	4	2	2.05984	0.996375	206.733	728.341	99.6609	87	9.9	8.78788	3	0.34				53.3333	52.5	1.5625	0.833333	1
	IV	1	41	1	2		0	0	7	1	3	2	1.49452	1.29145	115.724	112.714	117.663	87	10.6	8.20755	4	0.34				51.6667	21.6667	58.0645	30	0
	IV	2	61	1	1	1,2	1	1	7	1	2	2	1.01091	1.44927	69.7533	96.5363	109.121	57.9	32.8	1.76524	21	0.32				100	44.1667	55.8333	55.8333	1
	IV	2	47	1	2		0	0	4	1	2	2	1.264	1.33915	94.3888	128.012	96.3712	74.8	22.2	3.36937	0	2.30				39.1667	12.5	68.0851	26.6667	0
